# Supplementary material for: Plakinamine P, A Steroidal Alkaloid with Bactericidal Activity against Mycobacterium tuberculosis
Source: PubMed Central journal article supplement (PMC6950683; doi:10.3390/md17120707), 2019-12-16
Supplement: marinedrugs-17-00707-s001.pdf [file marinedrugs-17-00707-s001.pdf]

# Plakinamine P, A Steroidal Alkaloid with Bactericidal Activity against *Mycobacterium tuberculosis*

Carolina Rodrigues Felix<sup>1</sup>, Jill C. Roberts<sup>2</sup>, Priscilla L. Winder<sup>2</sup>, Rashmi Gupta<sup>3</sup>, M. Cristina Diaz<sup>2</sup>, Shirley A. Pomponi<sup>2</sup>, Amy E. Wright<sup>2,\*</sup> and Kyle H. Rohde<sup>3,\*</sup>

<sup>1</sup> Biotechnology Department, Universidade Federal de Pelotas, Pelotas, RS 96010-610, Brazil; carolinarodriguesfelix@gmail.com

<sup>2</sup> Harbor Branch Oceanographic Institute, Florida Atlantic University, Fort Pierce, FL 34946, USA; jrober90@fau.edu (J.C.R.); PWINDER@fau.edu (P.L.W.); taxochica@gmail.com (M.C.D.); spomponi@fau.edu

<sup>3</sup> Division of Immunity and Pathogenesis, Burnett School of Biomedical Sciences, College of Medicine, University of Central Florida, Orlando, FL 32827, USA.; rashmi.gupta@ucf.edu

\* Correspondence: awrigh33@fau.edu ([A.E.W.](mailto:A.E.W.)); kyle.rohde@ucf.edu (K.H.R.); Tel.: +1 772-242-2459 (A.E.W.); +1 407-266-7124 (K.H.R.)

Received: 20 November 2019; Accepted: 10 December 2019; Published: Date

## Supporting Information

Figure S1: <sup>1</sup>H NMR (600 MHz, CD<sub>3</sub>OD) of Plakinamine P (1)

Figure S2: Expansion of <sup>1</sup>H NMR (600 MHz, CD<sub>3</sub>OD) of Plakinamine P (1)

Figure S3: <sup>13</sup>C NMR (150 MHz, CD<sub>3</sub>OD) of Plakinamine P (1)

Figure S4: gCOSY spectrum (600 MHz, CD<sub>3</sub>OD) of Plakinamine P (1)

Figure S5: gCOSY spectrum expansion key side chain correlations (600 MHz, CD<sub>3</sub>OD) of Plakinamine P (1)

Figure S6: edited gHSQC spectrum (600 MHz, CD<sub>3</sub>OD) of Plakinamine P (1)

Figure S7: Expansion 1 of edited gHSQC spectrum (600 MHz, CD<sub>3</sub>OD) Plakinamine P (1)

Figure S8: Expansion 2 of edited gHSQC spectrum (600 MHz, CD<sub>3</sub>OD) of Plakinamine P (1)

Figure S9: gHMBC spectrum (600 MHz, CD<sub>3</sub>OD) of Plakinamine P (1)

Figure S10: gHMBC spectrum expansion of N,N dimethyl amino proton correlations (600 MHz, CD<sub>3</sub>OD) of Plakinamine P (1)

Figure S11: gHMBC spectrum expansion with key side chain correlations (600 MHz, CD<sub>3</sub>OD) of Plakinamine P (1)

Figure S12: Structure of plakinamine P (1) with key gHMBC correlations observed in CD<sub>3</sub>OD (600 MHz)

Figure S13: gROESY spectrum (600 MHz, CD<sub>3</sub>OD) of Plakinamine P (1)

Figure S14: Structure of plakinamine P (1) with chemical shifts in CD<sub>3</sub>OD (600 MHz)

Table S1: Table of <sup>1</sup>H and <sup>13</sup>C NMR Data for plakinamine P (1) (600 MHz, CD<sub>3</sub>OD)

Figure S15: <sup>1</sup>H NMR (600 MHz, DMSO-*d*<sub>6</sub>) of Plakinamine P (1)

Figure S16: Expansion of <sup>1</sup>H NMR (600 MHz, DMSO-*d*<sub>6</sub>) of Plakinamine P (1)

Figure S17: <sup>13</sup>C NMR (150 MHz, DMSO-*d*<sub>6</sub>) of Plakinamine P (1)

Figure S18: gDQF-COSY spectrum (600 MHz, DMSO-*d*<sub>6</sub>) of Plakinamine P (**1**)

Figure S19: edited gHSQC spectrum (600 MHz, DMSO-*d*<sub>6</sub>) of Plakinamine P (**1**)

Figure S20: gHMBC spectrum (600 MHz, DMSO-*d*<sub>6</sub>) of Plakinamine P (**1**)

Figure S21: NOESY spectrum (600 MHz, DMSO-*d*<sub>6</sub>) of Plakinamine P (**1**)

Figure S22: Expansion of Plakinamine P (**1**) 2D-NOESY spectrum (600 MHz, DMSO-*d*<sub>6</sub>) showing key correlations for H-3

Figure S23: ROESY spectrum (600 MHz, DMSO-*d*<sub>6</sub>) of Plakinamine P (**1**)

Figure S24: Structure of plakinamine P (**1**) with chemical shifts observed in DMSO-*d*<sub>6</sub>

Table S2: Table of <sup>1</sup>H and <sup>13</sup>C NMR Data for plakinamine P (**1**) (600 MHz, DMSO-*d*<sub>6</sub>)

Figure S25: High resolution DART mass spectrometry data of plakinamine P (**1**)

Figure S26: Picture and taxonomic description of the *Plakina* sp. used in the study

S1 <sup>1</sup>H NMR (600 MHz, CD<sub>3</sub>OD) of Plakinamine P (1)

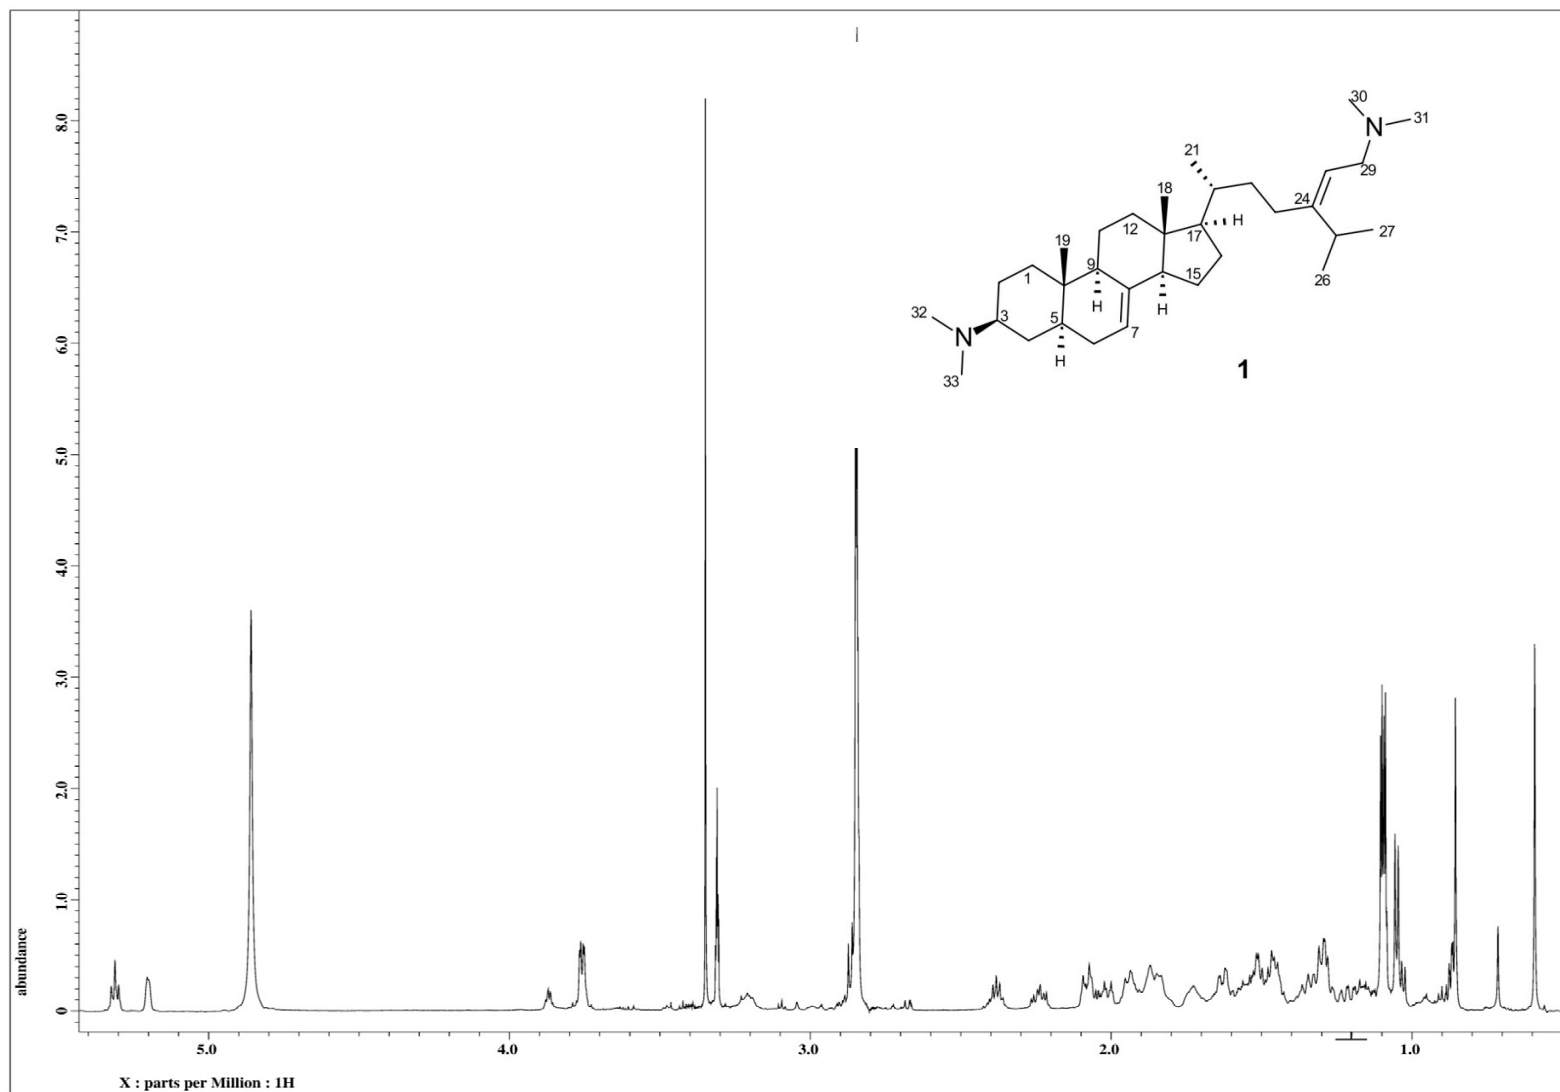

S2 Expansion of  $^1\text{H}$  NMR (600 MHz,  $\text{CD}_3\text{OD}$ ) of Plakinamine P (1)

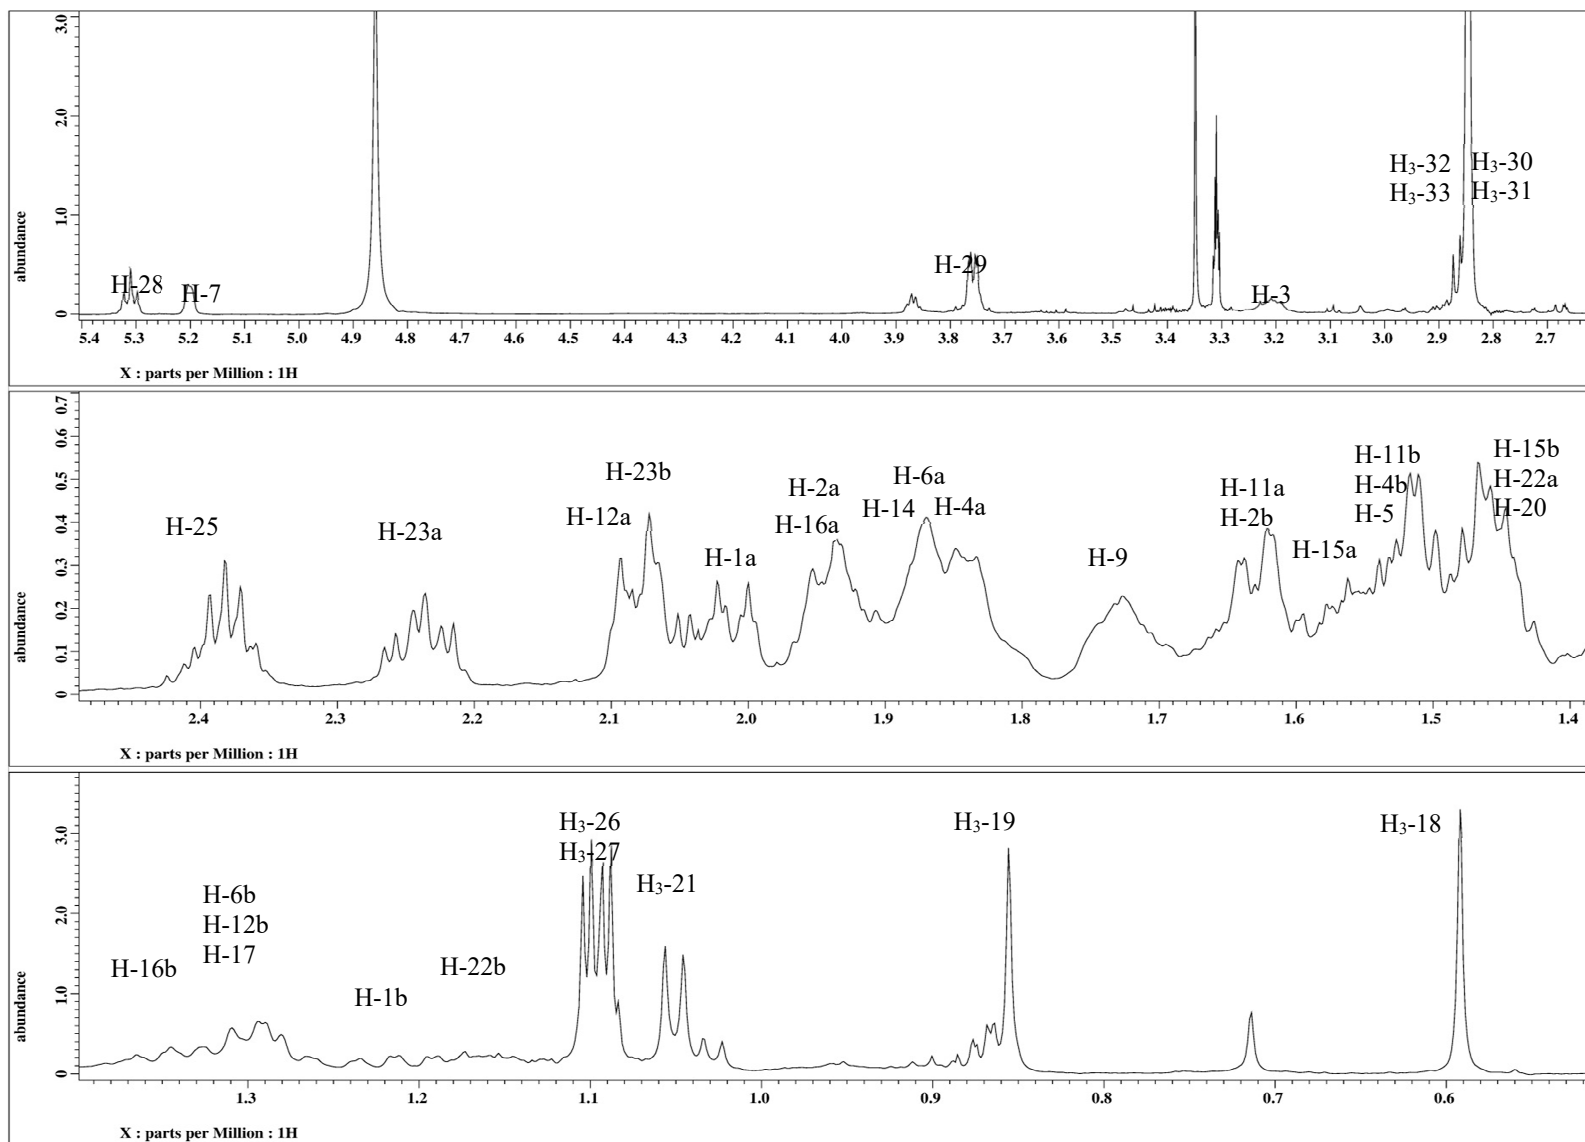

S3  $^{13}\text{C}$  NMR (150 MHz,  $\text{CD}_3\text{OD}$ ) of Plakinamine P (1)

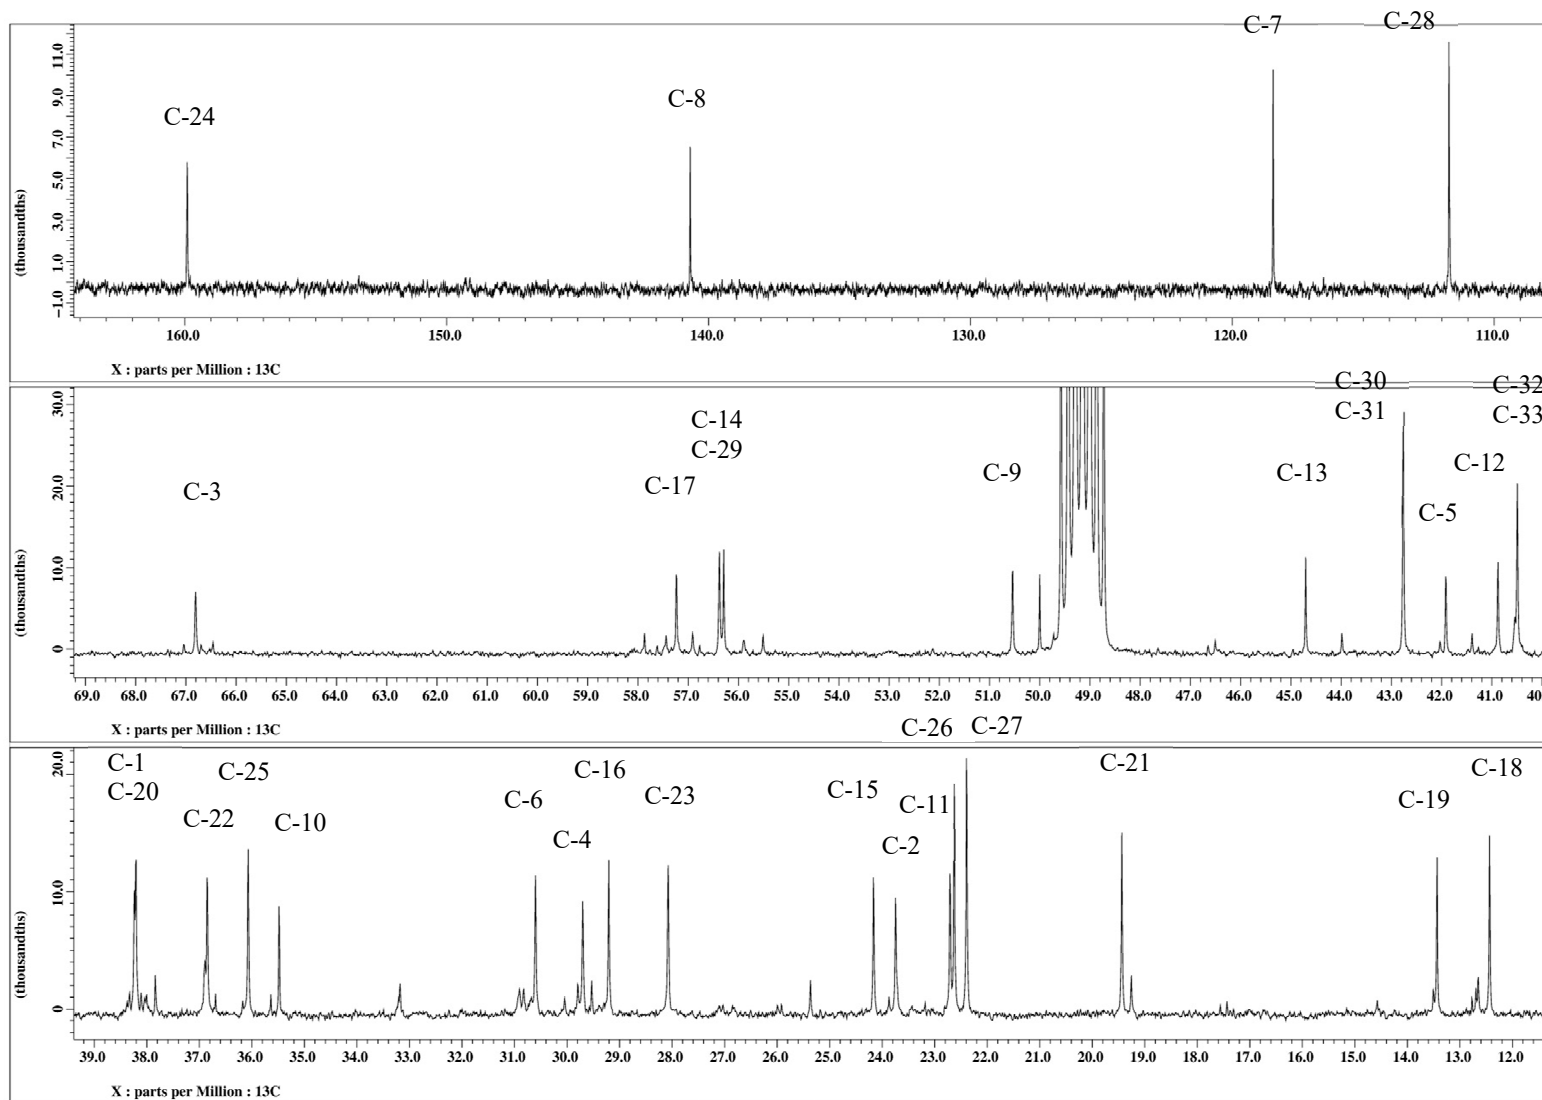

S4 g-COSY spectrum (600 MHz, CD<sub>3</sub>OD) of Plakinamine P (1)

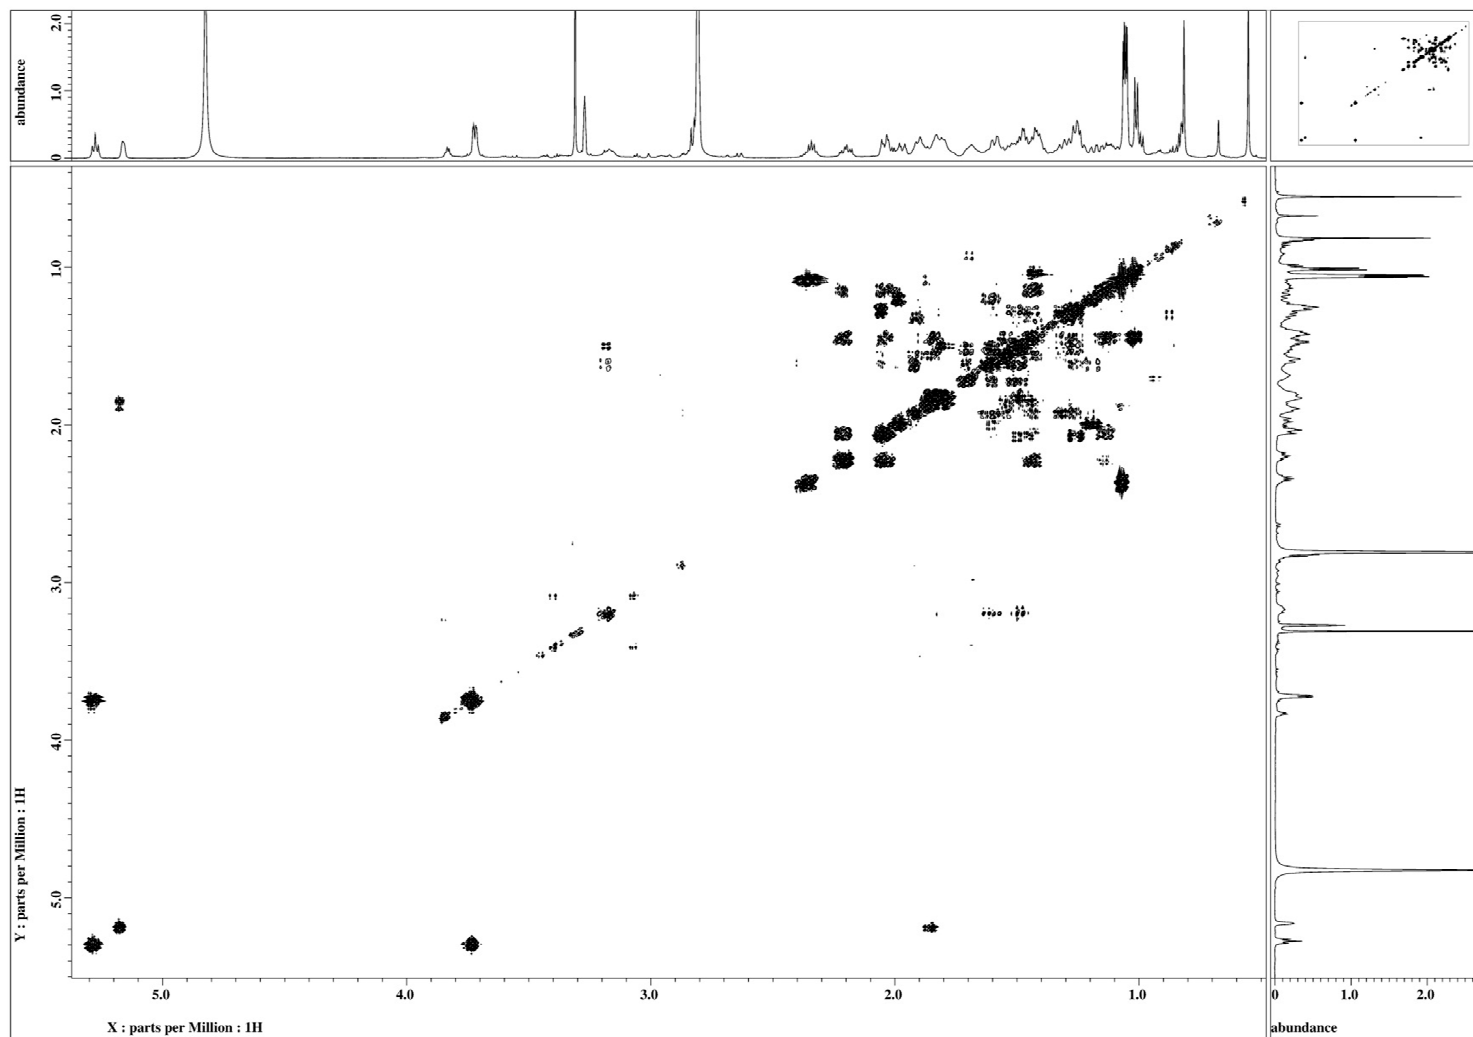

S5 g-COSY spectrum expansion key side chain correlations (600 MHz, CD<sub>3</sub>OD) of Plakinamine P (1)

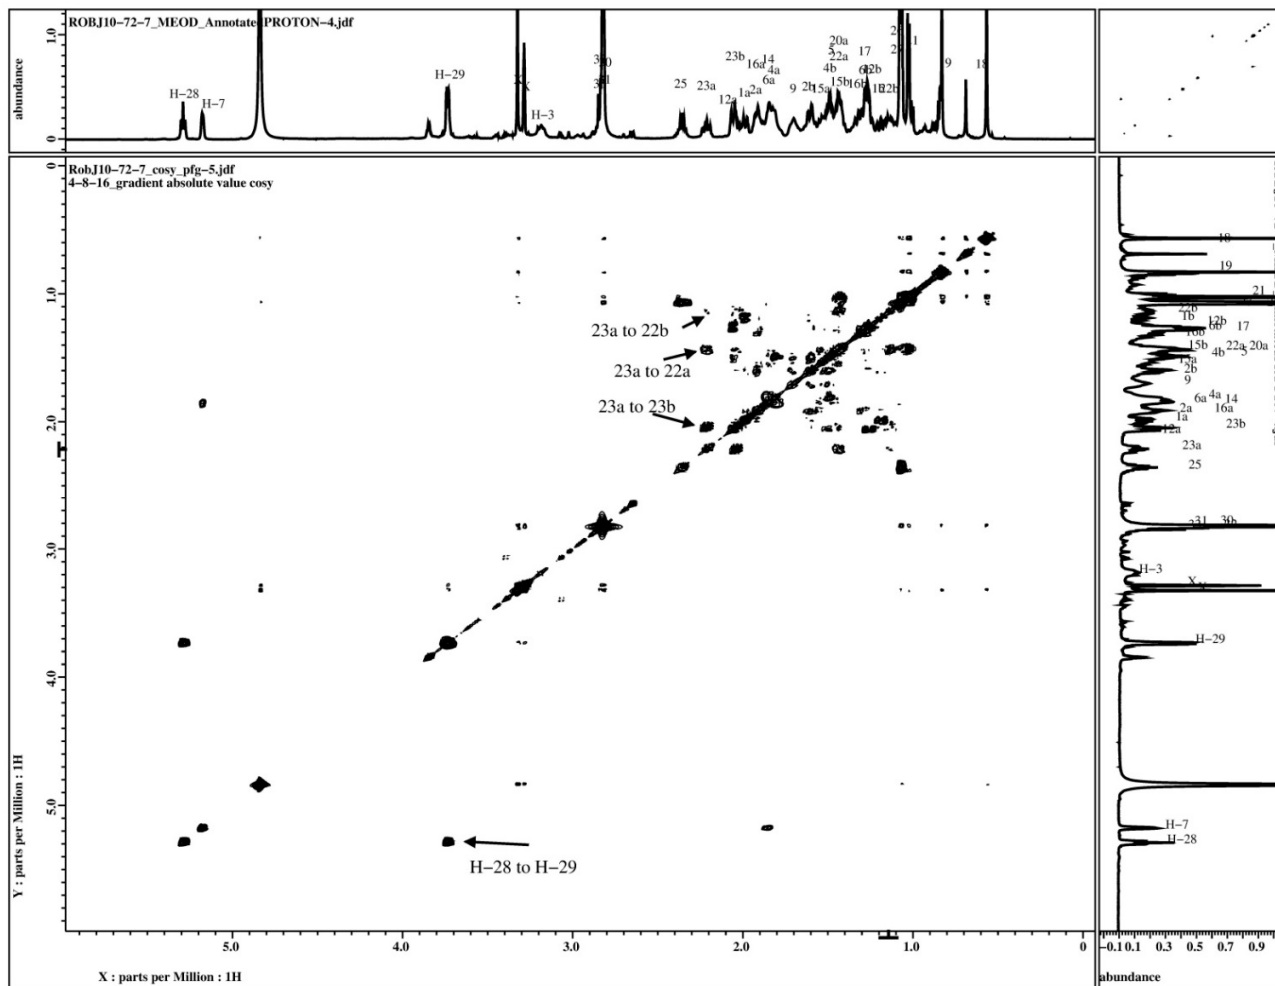

S6 edited gHSQC spectrum (600 MHz, CD<sub>3</sub>OD) of Plakinamine P (1)

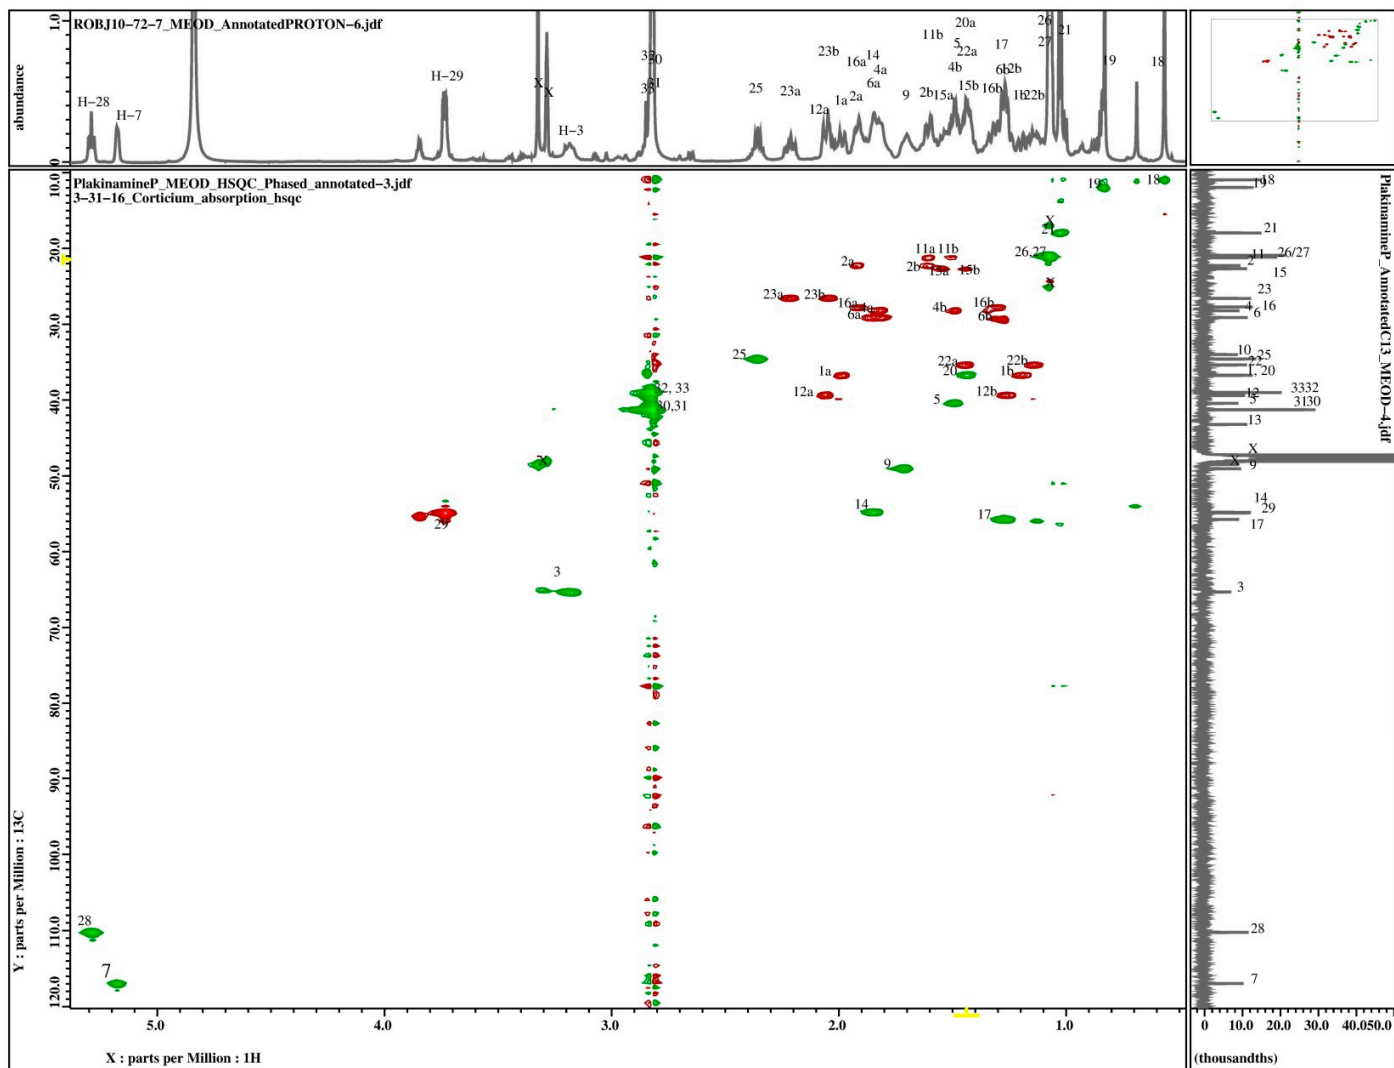



S7 Expansion 1 of edited gHSQC spectrum (600 MHz, CD<sub>3</sub>OD) Plakinamine P (1)

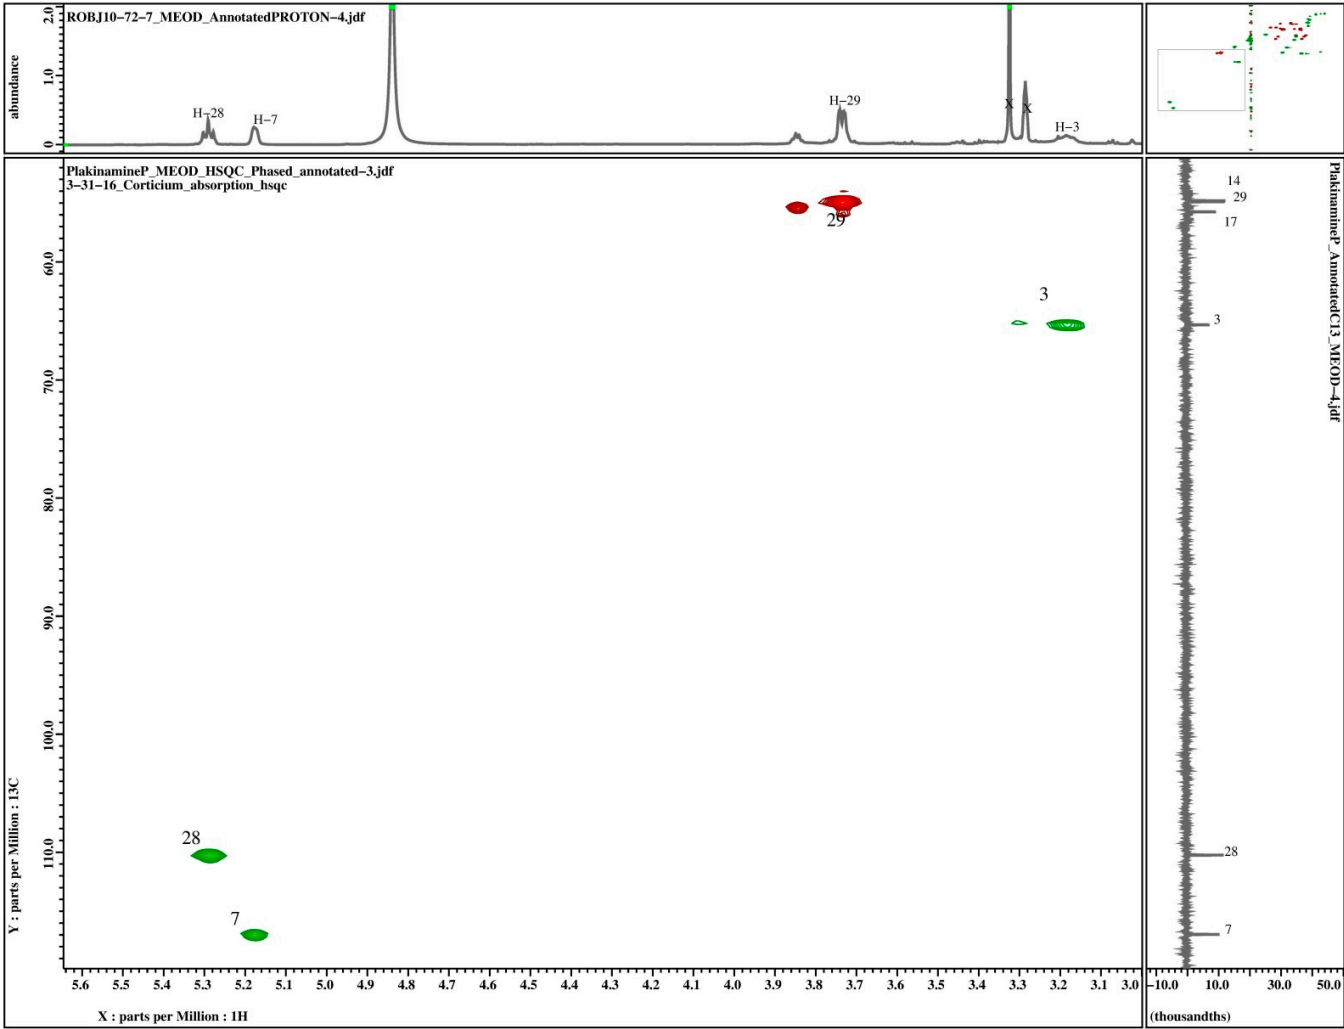

S8 Expansion 2 of edited gHSQC spectrum (600 MHz, CD<sub>3</sub>OD) of Plakinamine P (1)

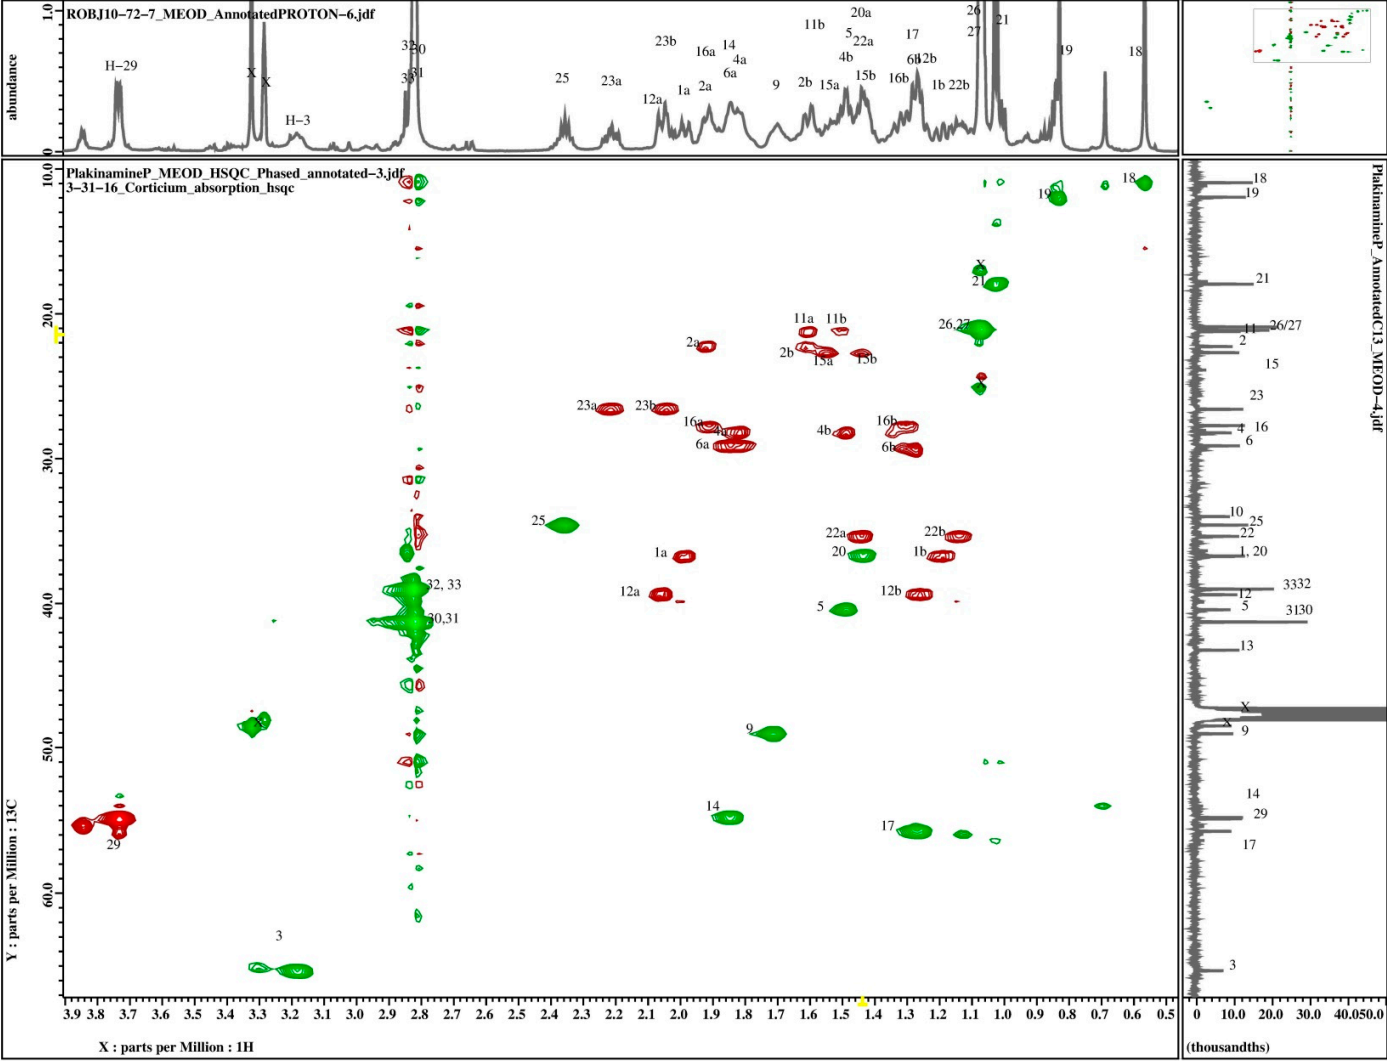

S9 gHMBC spectrum (600 MHz, CD<sub>3</sub>OD) of Plakinamine P (1)

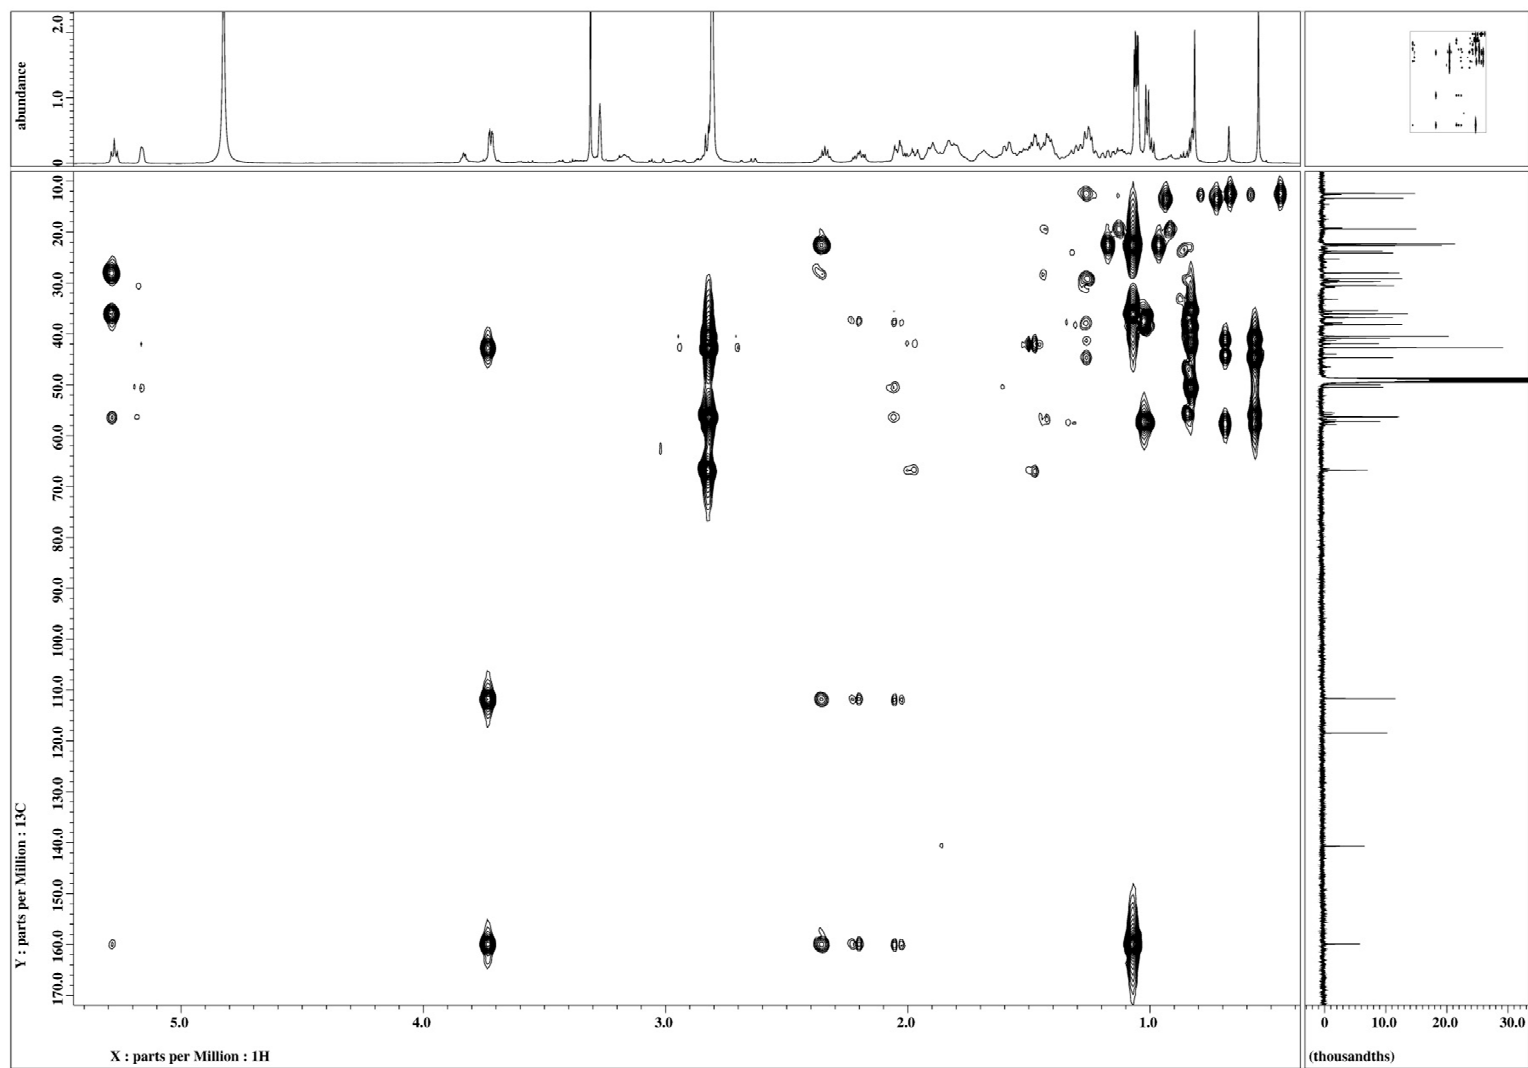

S10 gHMBC spectrum expansion of N,N dimethyl amino proton correlations (600 MHz, CD<sub>3</sub>OD) of Plakinamine P (1)

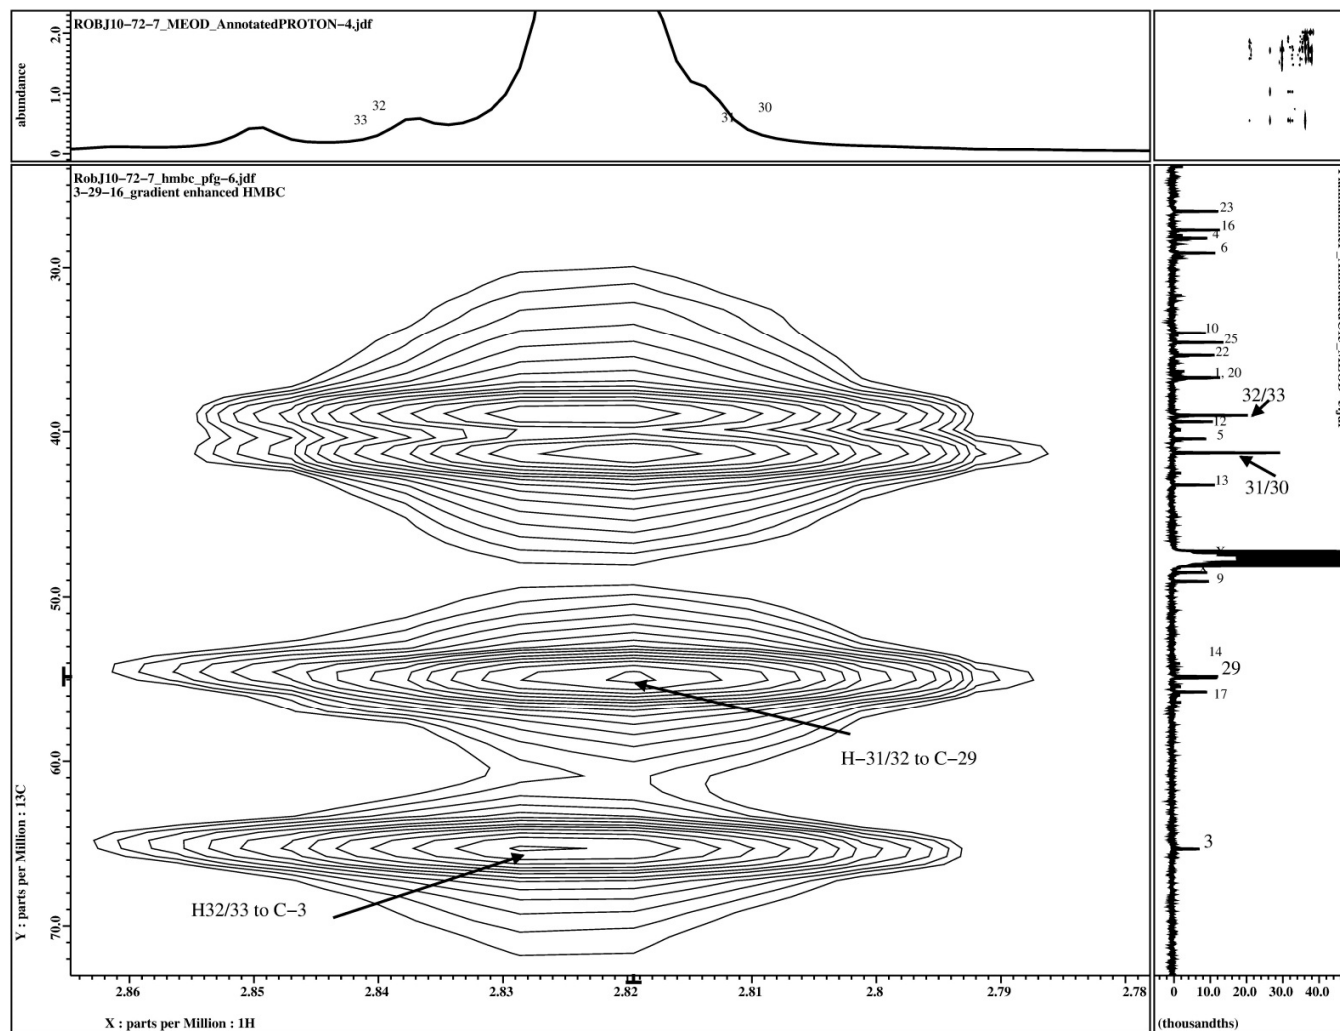

S11 gHMBC spectrum expansion with key side chain correlations (600 MHz, CD<sub>3</sub>OD) of Plakinamine P (1)

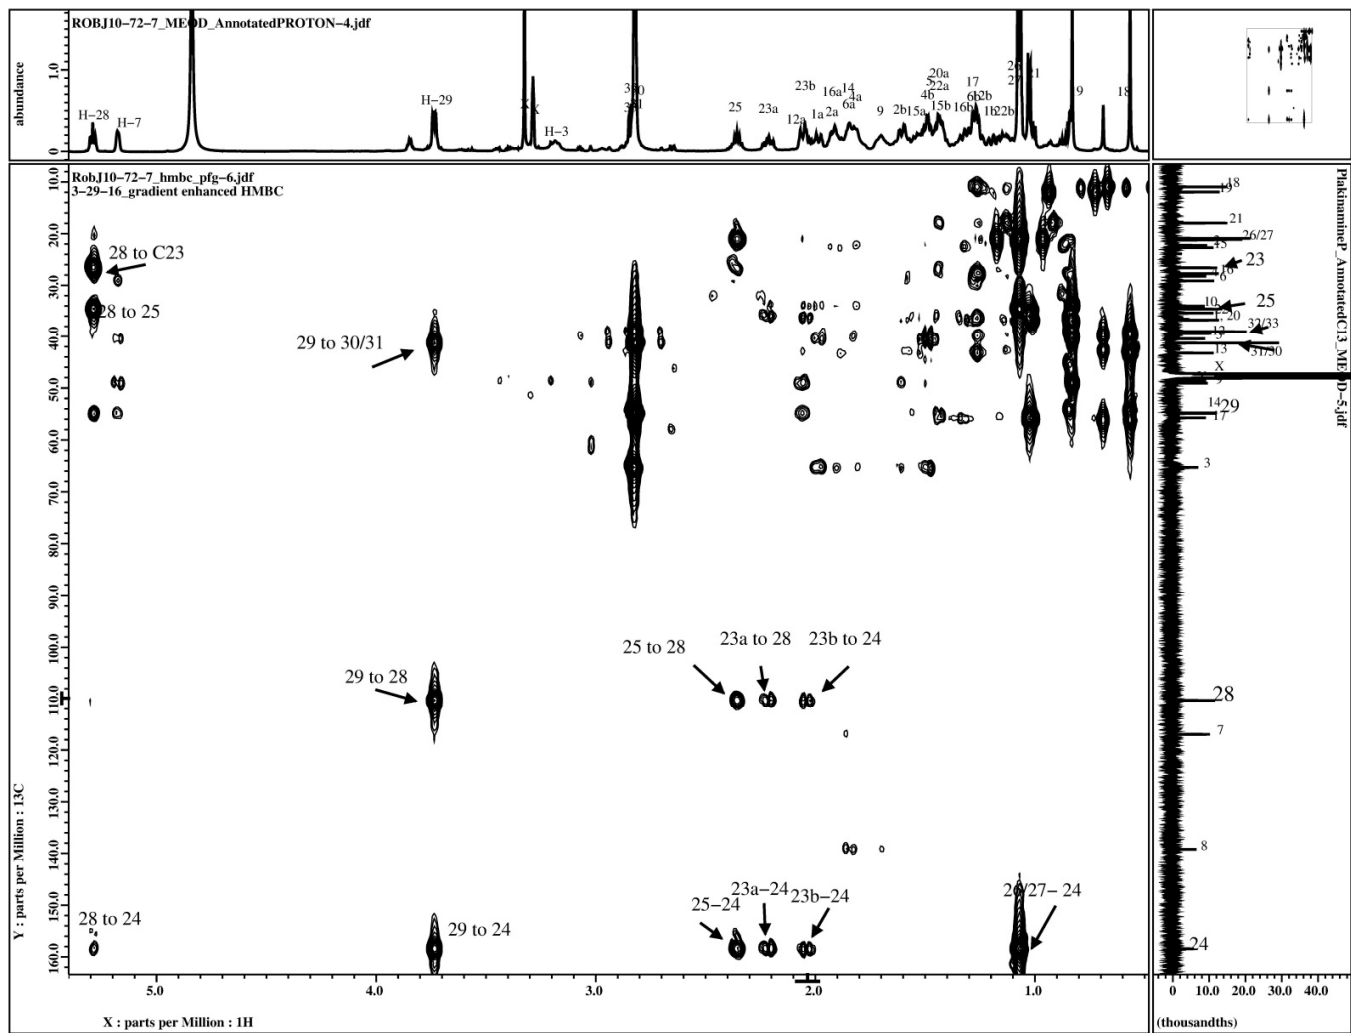

S12 Structure of plakinamine P (1) with key gHMBC correlations observed in CD<sub>3</sub>OD (600 MHz)

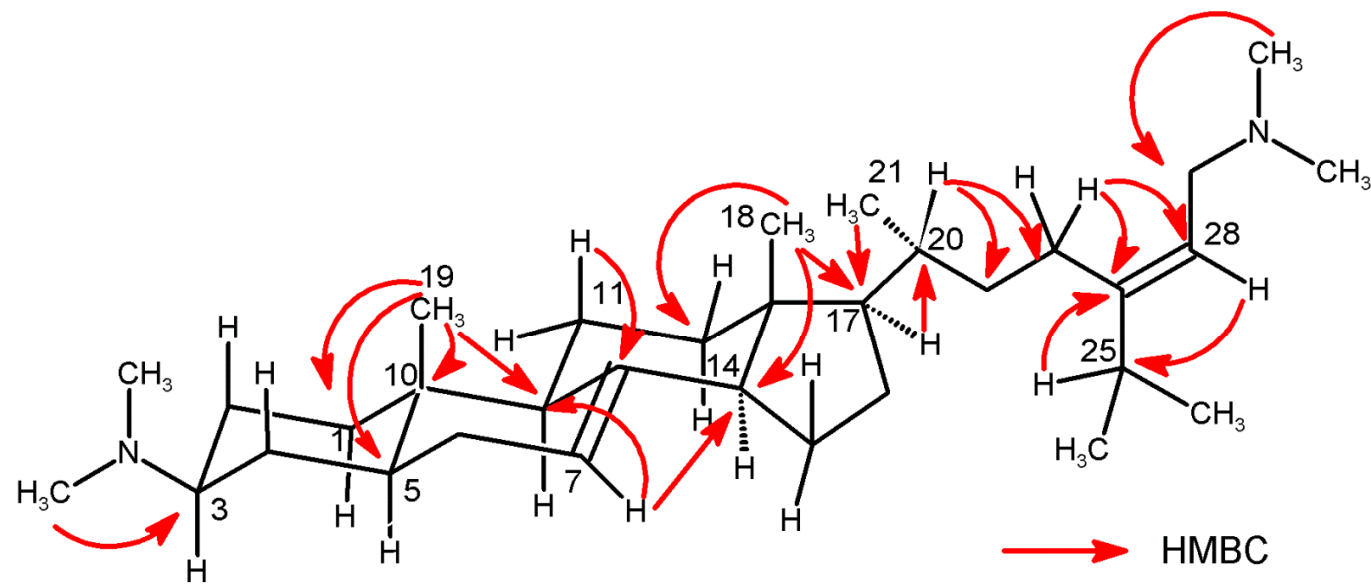

# S13 gROESY spectrum (600 MHz, CD<sub>3</sub>OD) of Plakinamine P (1)

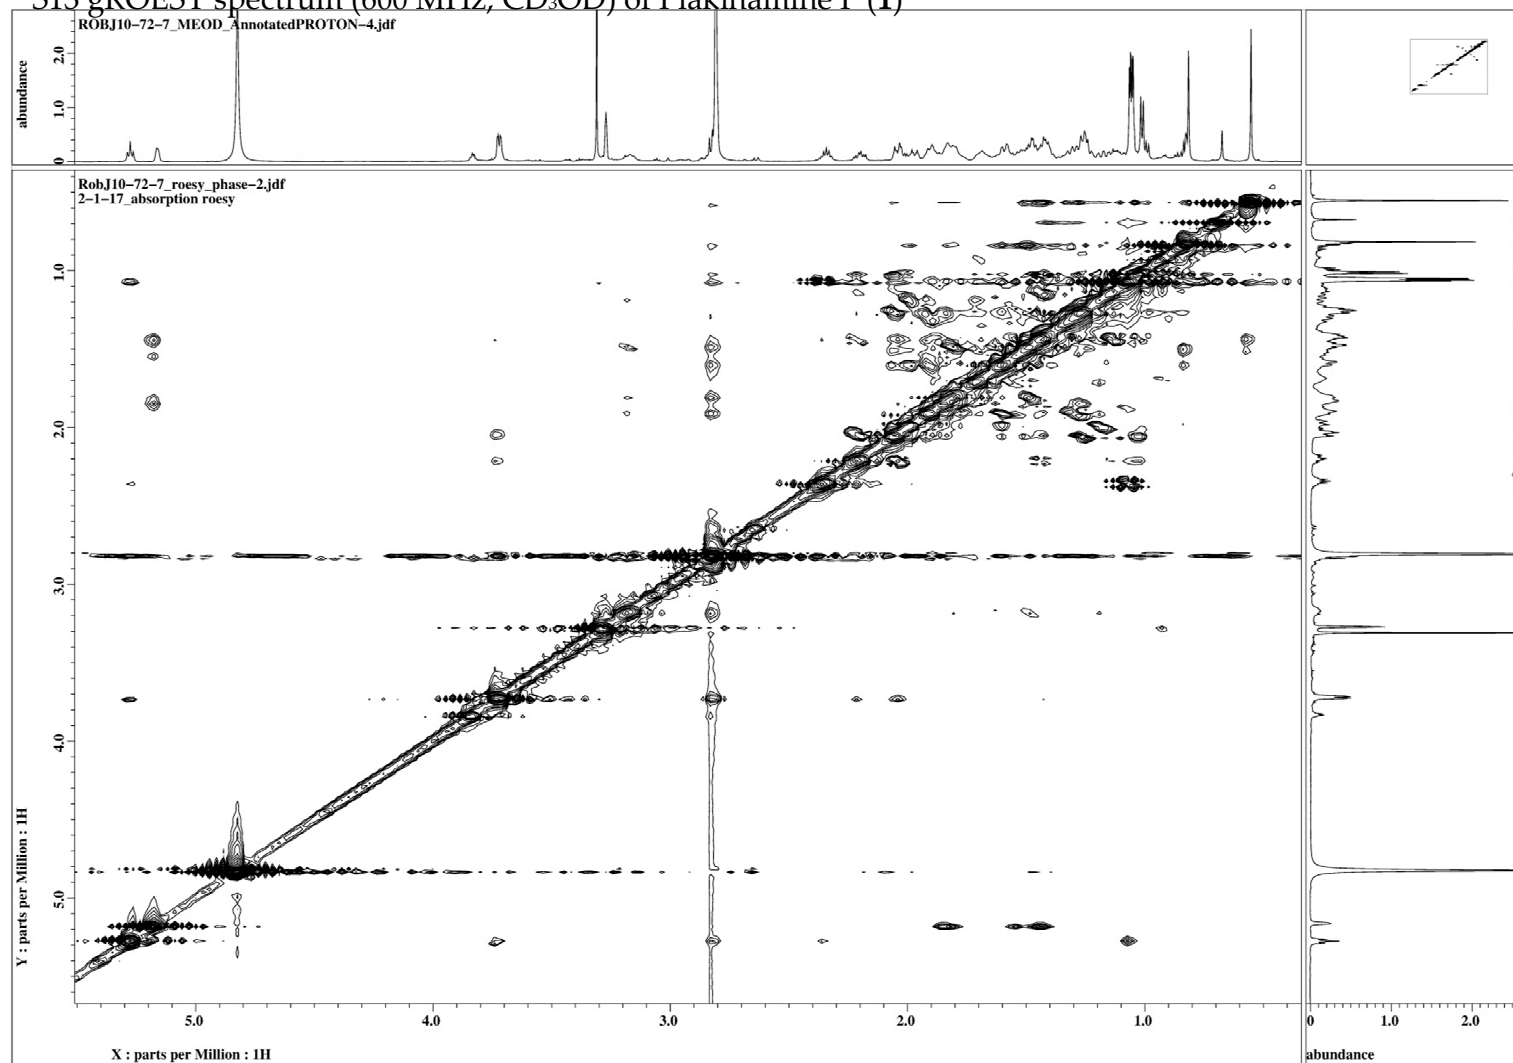

S14 Structure of plakinamine P (1) with chemical shifts in CD<sub>3</sub>OD (600 MHz)

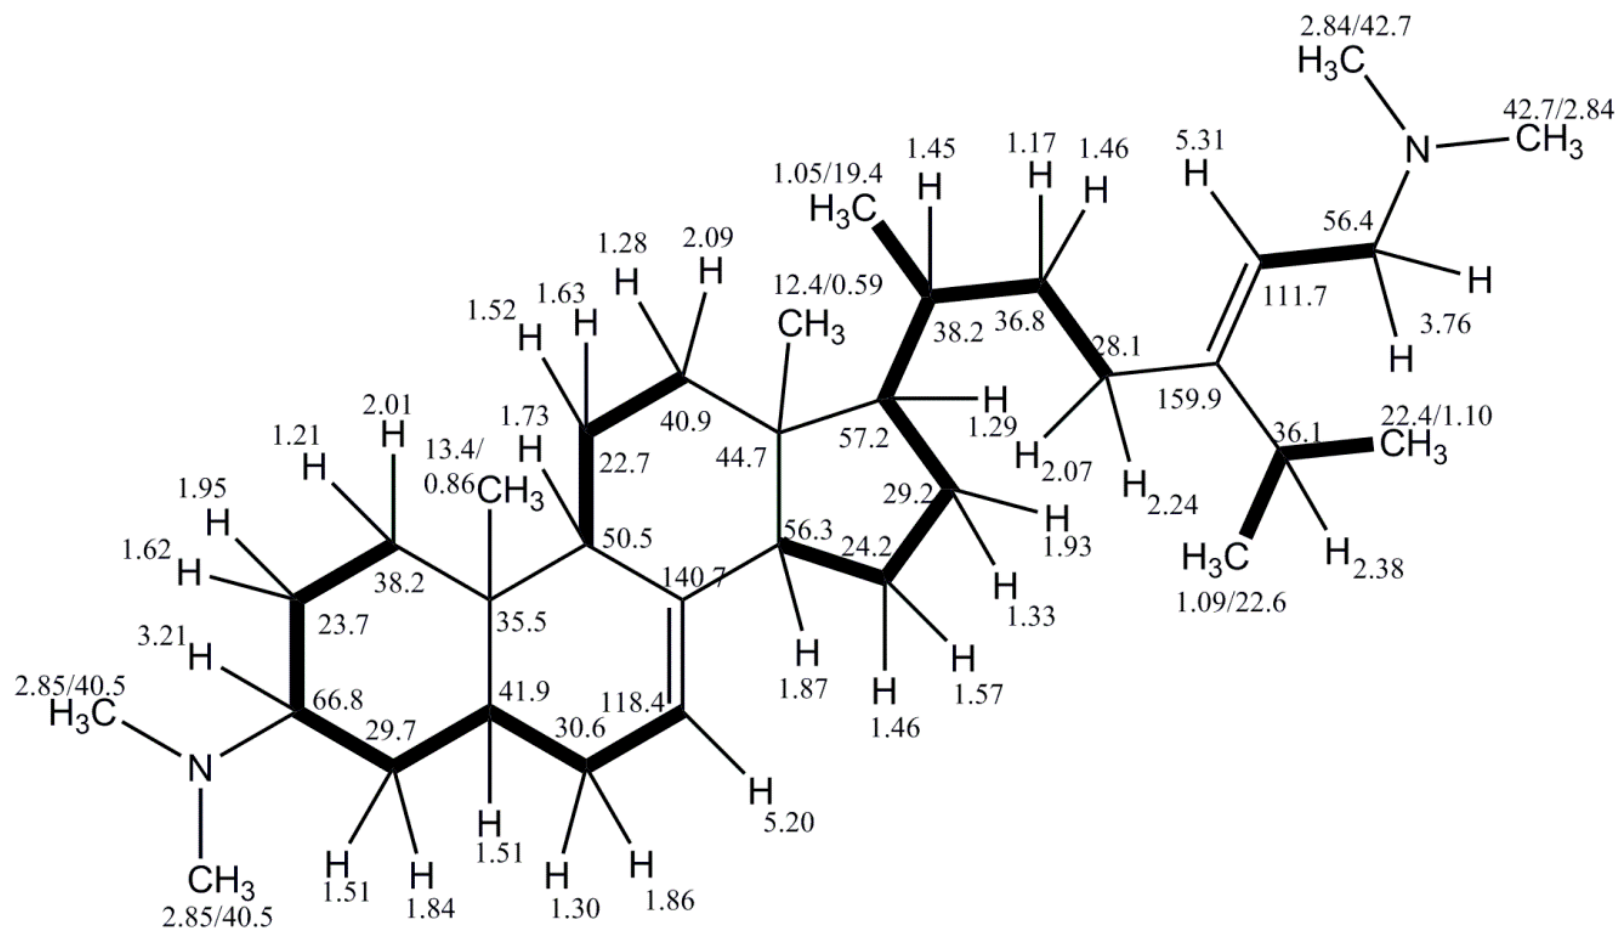



Table S1: Table of <sup>1</sup>H and <sup>13</sup>C NMR Data for plakinamine P (**1**) (600 MHz, CD<sub>3</sub>OD)

| position | $\delta_C$ , type     | $\delta_H$ (J in Hz)                                         | COSY          | HMBC <sup>a</sup>      | ROESY                 |
|----------|-----------------------|--------------------------------------------------------------|---------------|------------------------|-----------------------|
| 1a       | 38.2, CH <sub>2</sub> | 2.01 (ddd, 13.8, 4.1, 4.1)<br>1.21 (ddd, 13.8, 13.8,<br>3.4) | 1b, 2ab       | 3, 5, 10               | 1b, 2b                |
| 1b       |                       |                                                              | 1a, 2ab       | 19                     | 1a, 2a, 3, 9          |
| 2a       | 23.7, CH <sub>2</sub> | 1.95 (m)                                                     | 1ab, 2b, 3    | 1, 3, 4, 10            | 2b, 32/33             |
| 2b       |                       | 1.62 (m)                                                     | 1ab, 2a, 3    | 1, 3, 10               | 1a, 2a, 32/33         |
| 3        | 66.8, CH              | 3.21 (m)                                                     | 2ab, 4ab      |                        | 1b, 32/33             |
| 4a       | 29.7, CH <sub>2</sub> | 1.84 (m)                                                     | 3, 4b, 5      | 2, 3, 10               | 32/33                 |
| 4b       |                       | 1.51 (m)                                                     | 3, 4a, 5      | 3, 5                   |                       |
| 5        | 41.9, CH              | 1.51 (m)                                                     | 4ab, 6ab      | 3                      |                       |
| 6a       | 30.6, CH <sub>2</sub> | 1.86 (m)                                                     | 5, 7          | 7, 8                   | 7                     |
| 6b       |                       | 1.30 (m)                                                     | 5, 7          | 4, 5                   |                       |
| 7        | 118.4, CH             | 5.20 (br d, 2.8)                                             | 6ab           | 5, 6, 9, 14            | 14                    |
| 8        | 140.7, C              |                                                              |               |                        |                       |
| 9        | 50.5, CH              | 1.73 (m)                                                     | 11ab          | 8, 11                  | 1b, 11a               |
| 10       | 35.5, C               |                                                              |               |                        |                       |
| 11a      | 22.7, CH <sub>2</sub> | 1.63 (m)                                                     | 9, 11b, 12ab  | 8, 9                   | 9, 12a                |
| 11b      |                       | 1.52 (m)                                                     | 9, 11a, 12ab  | 8, 9, 10, 13           | 11a, 12a, 19          |
| 12a      | 40.9, CH <sub>2</sub> | 2.09 (m)                                                     | 11ab, 12b     | 9, 11, 13, 14          | 11ab, 12b, 18, 21     |
| 12b      |                       | 1.28 (m)                                                     | 11ab, 12a     |                        | 11ab, 12a             |
| 13       | 44.7, C               |                                                              |               |                        |                       |
| 14       | 56.3, CH              | 1.87 (m)                                                     | 15ab          | 7, 8, 13               | 7, 12b                |
| 15a      | 24.2, CH <sub>2</sub> | 1.57 (m)                                                     | 14, 15b, 16ab | 16                     | 7, 16a, 17            |
| 15b      |                       | 1.46 (m)                                                     | 14, 15a, 16ab |                        |                       |
| 16a      | 29.2, CH <sub>2</sub> | 1.93 (m)                                                     | 15ab, 16b, 17 | 13, 15                 | 15a, 17               |
| 16b      |                       | 1.33 (m)                                                     | 15ab, 16a, 17 | 15, 17, 20             | 16a                   |
| 17       | 57.2, CH              | 1.29 (m)                                                     | 16ab, 20      | 12, 13, 16, 18, 20, 21 | 12a, 14, 16a          |
| 18       | 12.4, CH <sub>3</sub> | 0.59 (s)                                                     |               | 12, 13, 14, 17         | 12a                   |
| 19       | 13.4, CH <sub>3</sub> | 0.86 (s)                                                     |               | 1, 5, 9, 10            | 11ab                  |
| 20       | 38.2, CH              | 1.45 (m)                                                     | 17, 21, 22ab  |                        |                       |
| 21       | 19.4, CH <sub>3</sub> | 1.05 (d, 6.9)                                                | 20            | 17, 20                 | 12a, 23ab             |
| 22a      | 36.8, CH <sub>2</sub> | 1.46 (m)                                                     | 20, 22b, 23ab |                        |                       |
| 22b      |                       | 1.17 (m)<br>2.24 (ddd, 12.7, 12.7,<br>4.8)                   | 20, 22a, 23ab | 20, 21                 |                       |
| 23a      | 28.1, CH <sub>2</sub> | 4.8)                                                         | 22ab, 23b     | 22, 24, 25, 28         | 21, 22b, 23b, 29      |
| 23b      |                       | 2.07 (m)                                                     | 22ab, 23a     | 22, 24, 25, 28         | 17, 20, 21, 23a, 29ab |
| 24       | 159.9, C              |                                                              |               |                        |                       |
| 25       | 36.1, CH              | 2.38 (sep, 6.9)                                              | 26, 27        | 23, 24, 26/27, 28      | 26/27, 28             |
| 26       | 22.6, CH <sub>3</sub> | 1.09 (d, 6.9)                                                | 25            | 24, 25, 27             | 25, 28                |
| 27       | 22.4, CH <sub>3</sub> | 1.10 (d, 6.9)                                                | 25            | 24, 25, 26             | 25, 28                |
| 28       | 111.7, CH             | 5.31 (t, 6.9)                                                | 29ab          | 23, 24, 25, 29         | 25, 26/27, 29, 30/31  |
| 29       | 56.4, CH <sub>2</sub> | 3.76 (dd, 7.6, 2.1)                                          | 28, 29b       | 24, 28, 30/31          | 23b, 26/27, 28, 30/31 |
| 30       | 42.7, CH <sub>3</sub> | 2.84 (s)                                                     |               | 29, 30/31              | 28, 29                |
| 31       | 42.7, CH <sub>3</sub> | 2.84 (s)                                                     |               | 29, 30/31              | 28, 29                |
| 32       | 40.5, CH <sub>3</sub> | 2.85 (s)                                                     |               | 3, 32/33               | 2b, 3                 |
| 33       | 40.5, CH <sub>3</sub> | 2.85 (s)                                                     |               | 3, 32/33               | 2b, 3                 |

<sup>a</sup>gHMBC correlations, optimized for 8 Hz, are from proton(s) stated to the carbons listed

S15  $^1\text{H}$  NMR (600 MHz,  $\text{DMSO-}d_6$ ) of Plakinamine P (**1**)

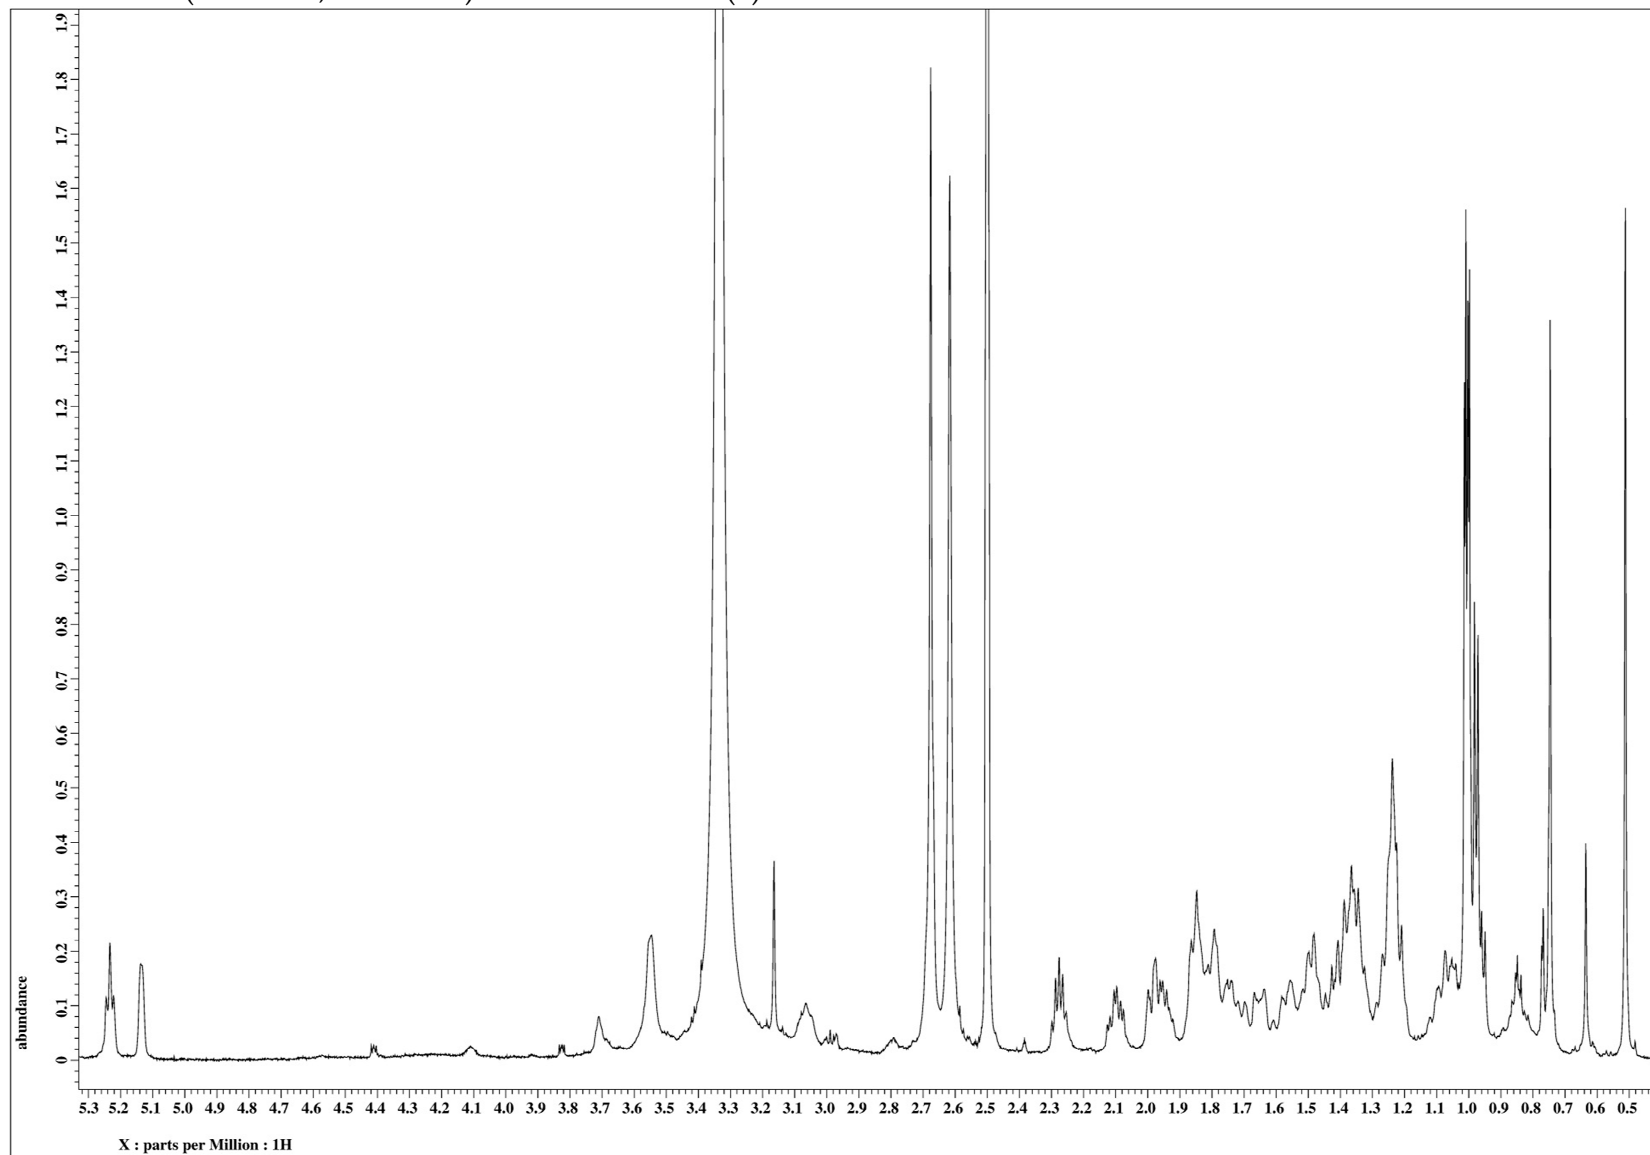

S16 Expansion of  $^1\text{H}$  NMR (600 MHz,  $\text{DMSO-}d_6$ ) of Plakinamine P (1)

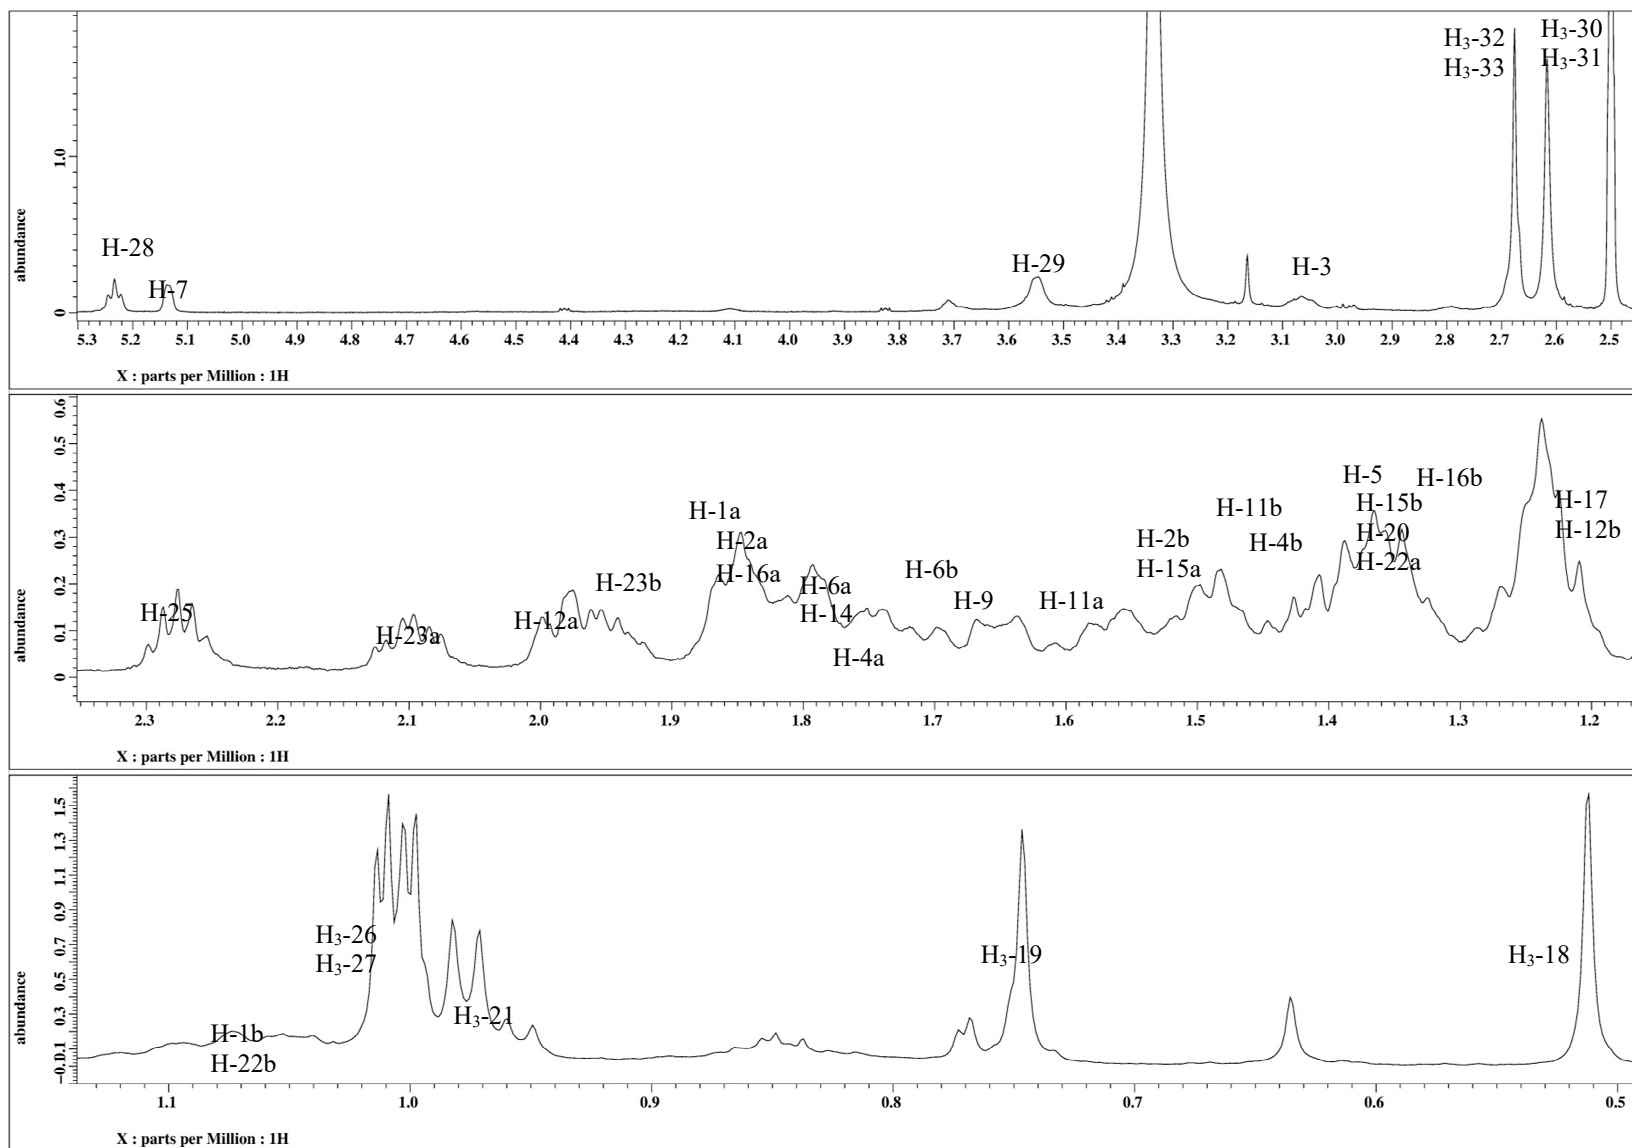

S17  $^{13}\text{C}$  NMR (150 MHz,  $\text{DMSO-}d_6$ ) of Plakinamine P (1)

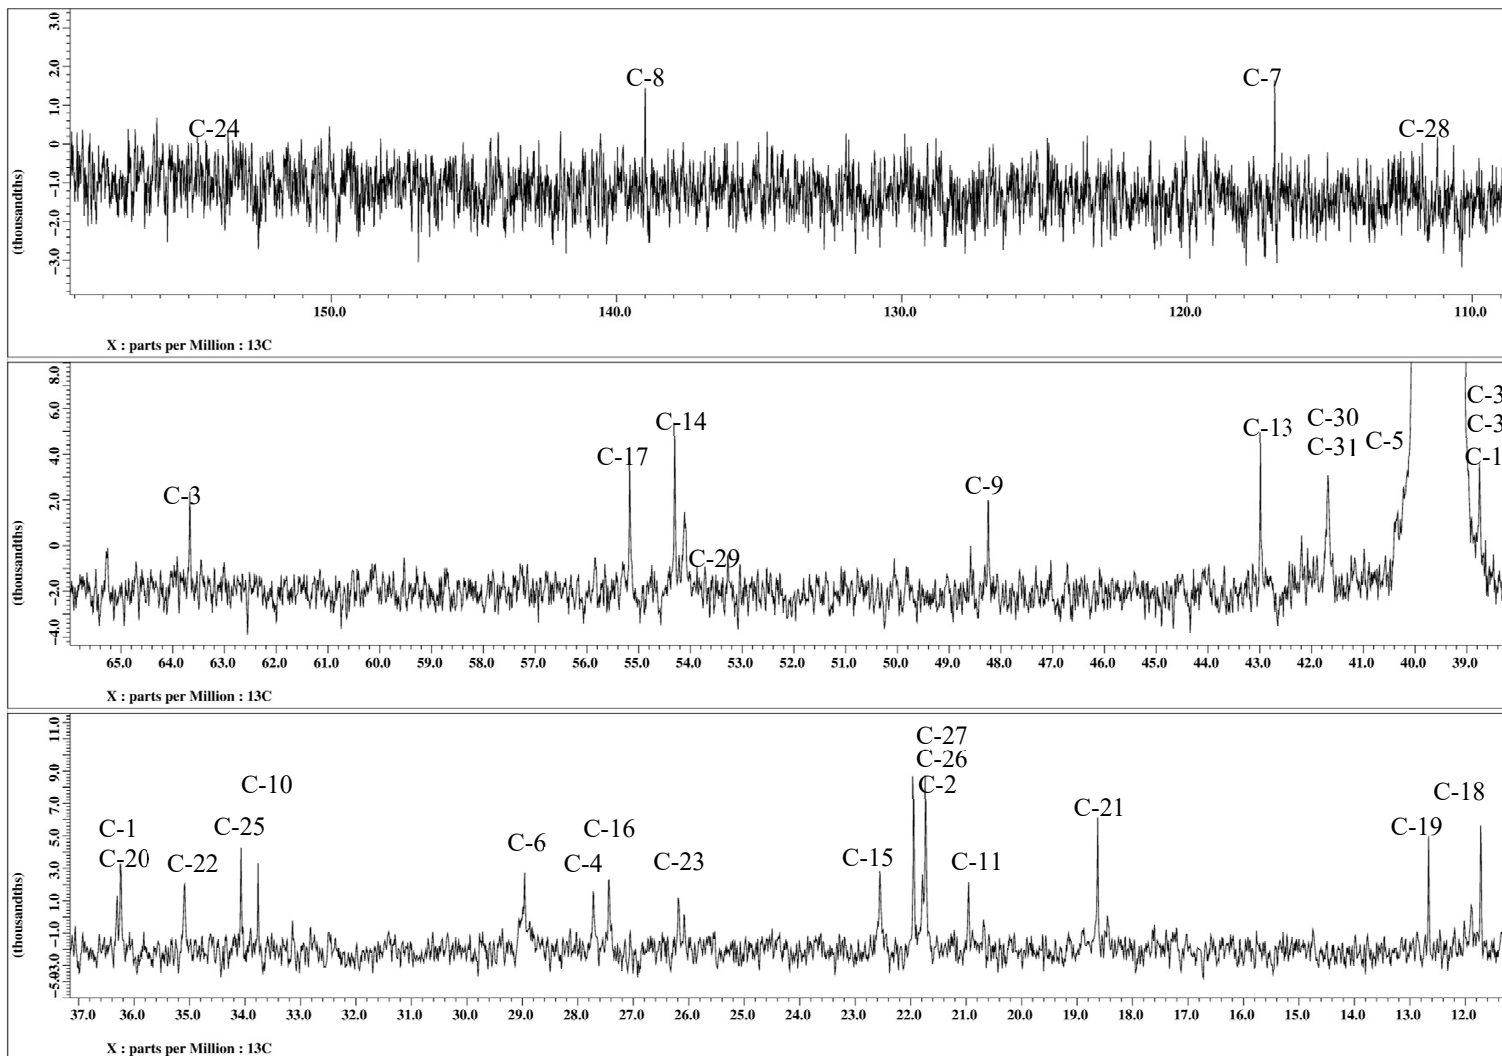

S18 gCOSY spectrum (600 MHz, DMSO-*d*<sub>6</sub>) of Plakinamine P (1)

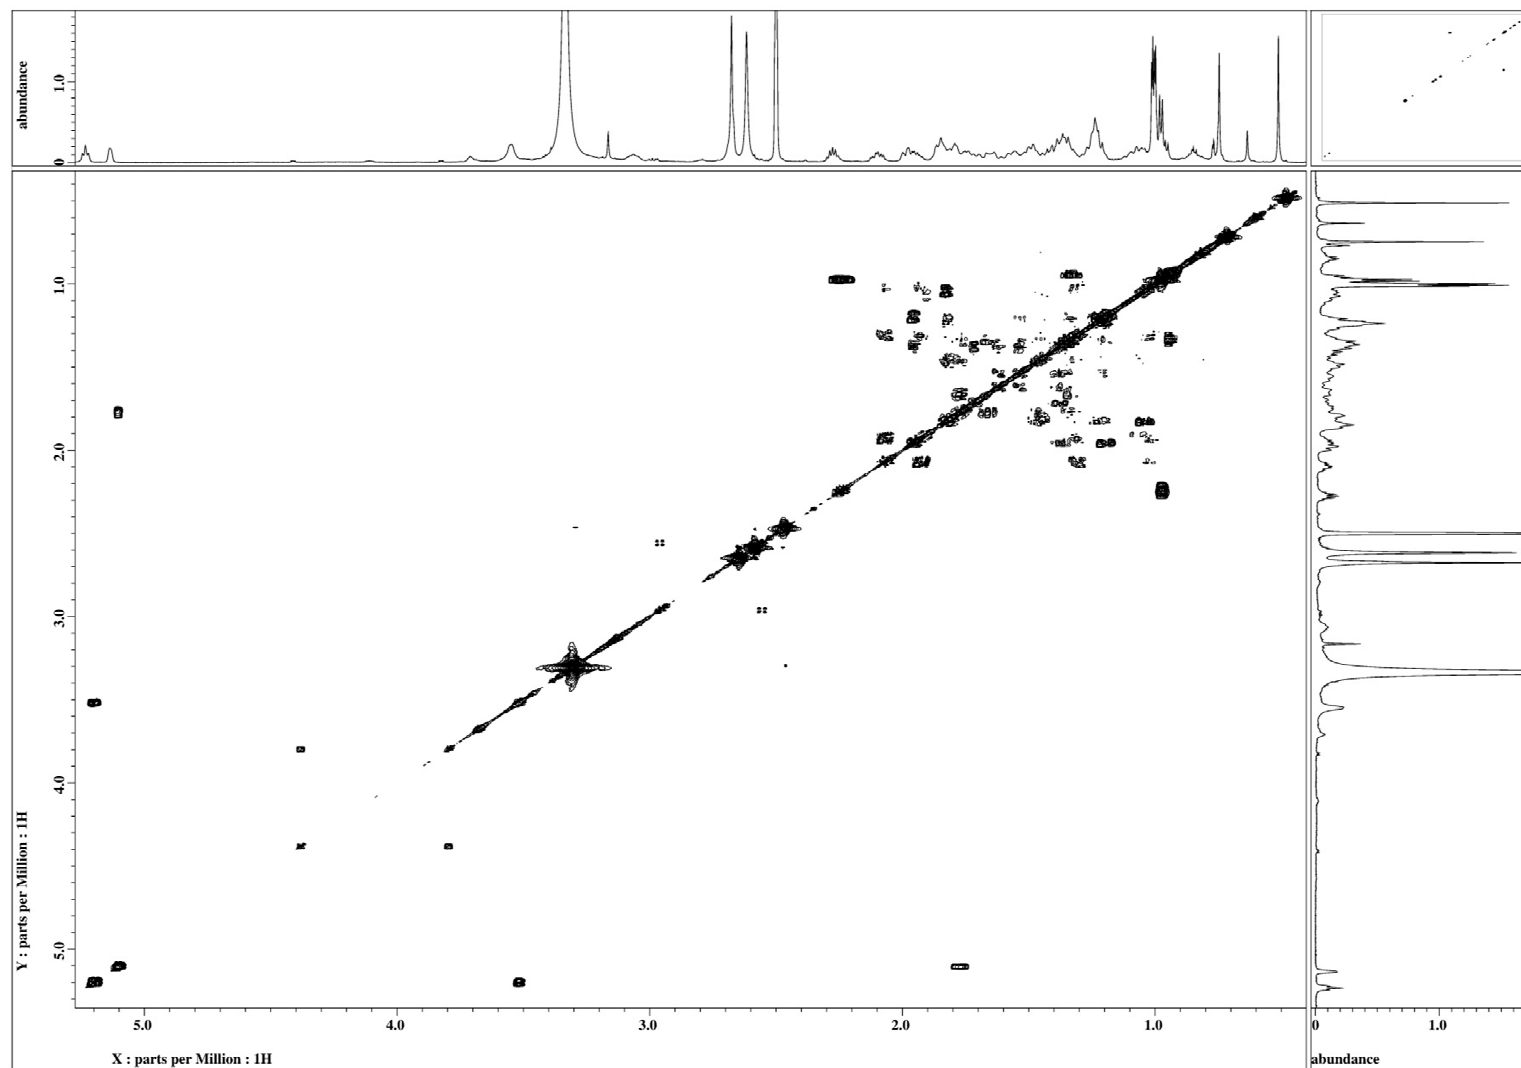

S19 edited gHSQC spectrum (600 MHz, DMSO-*d*<sub>6</sub>) of Plakinamine P (1)

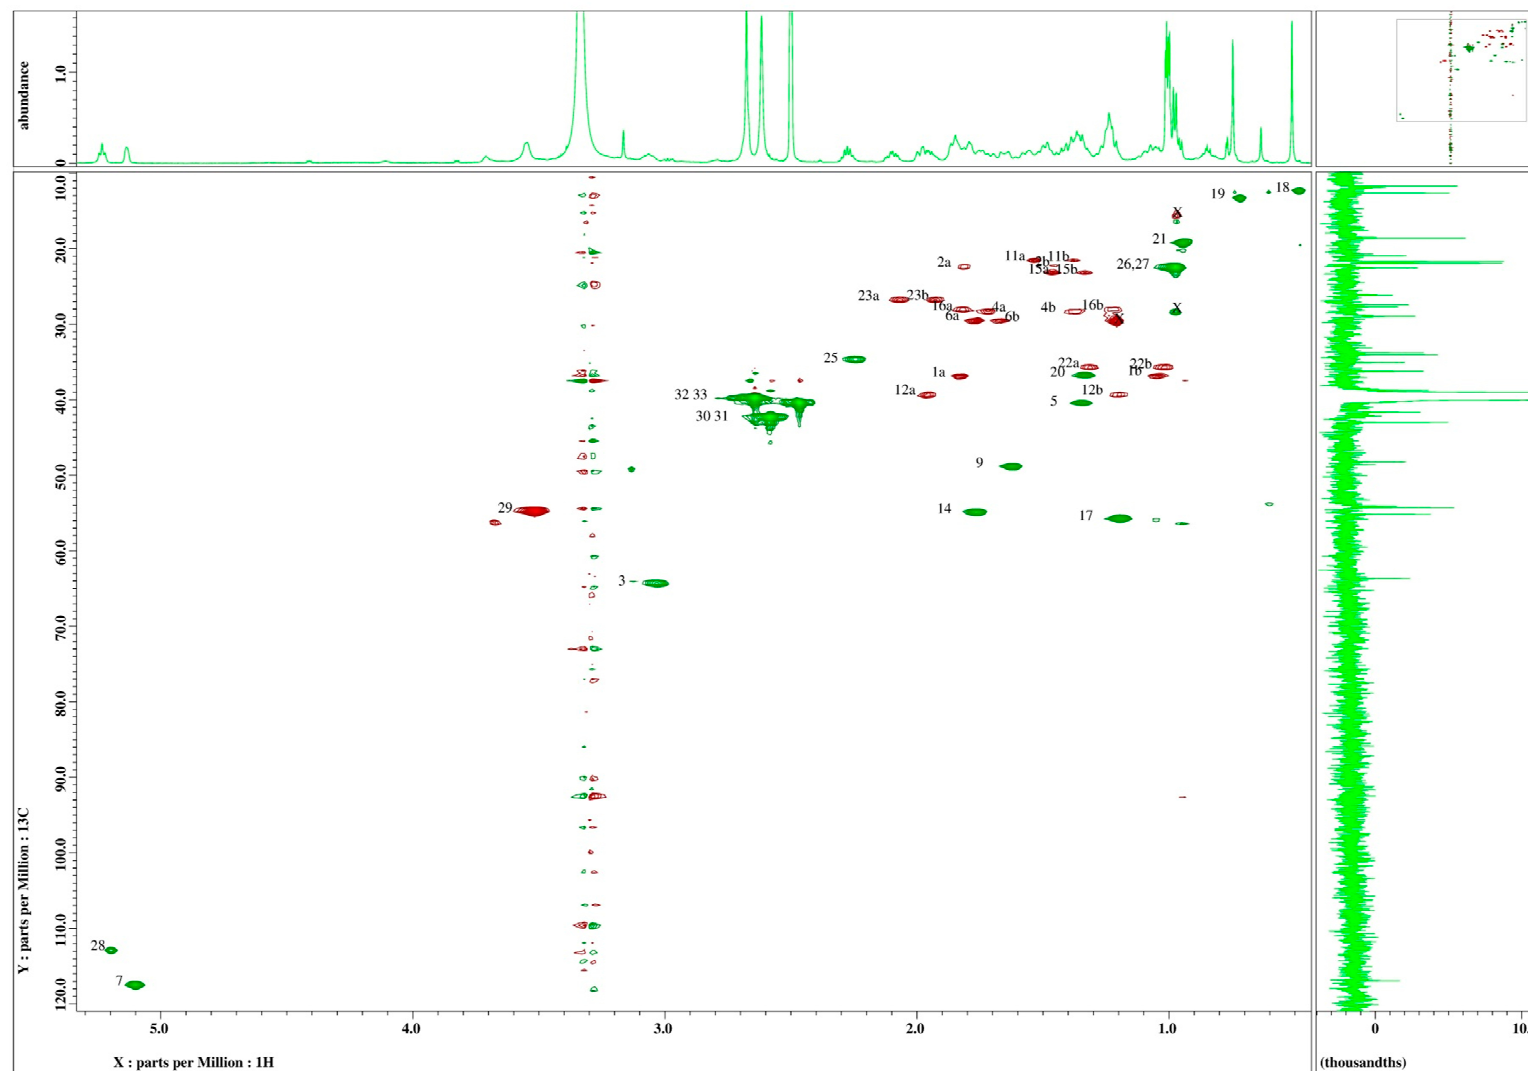

S20 gHMBC spectrum (600 MHz, DMSO-*d*<sub>6</sub>) of Plakinamine P (1)

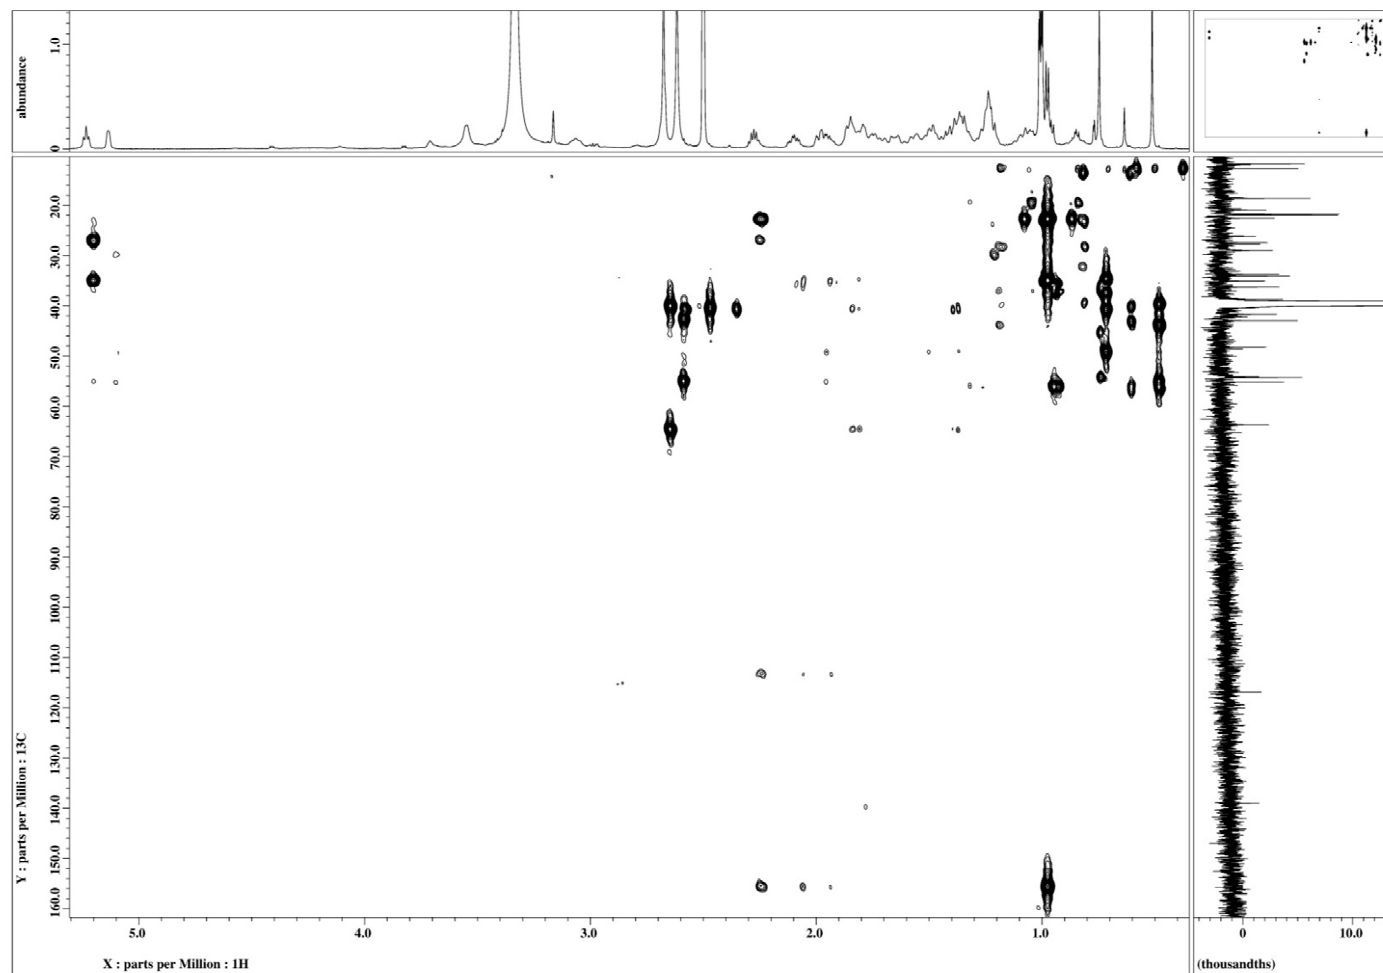

S21 NOESY spectrum (600 MHz, DMSO-*d*<sub>6</sub>) of Plakinamine P (1)

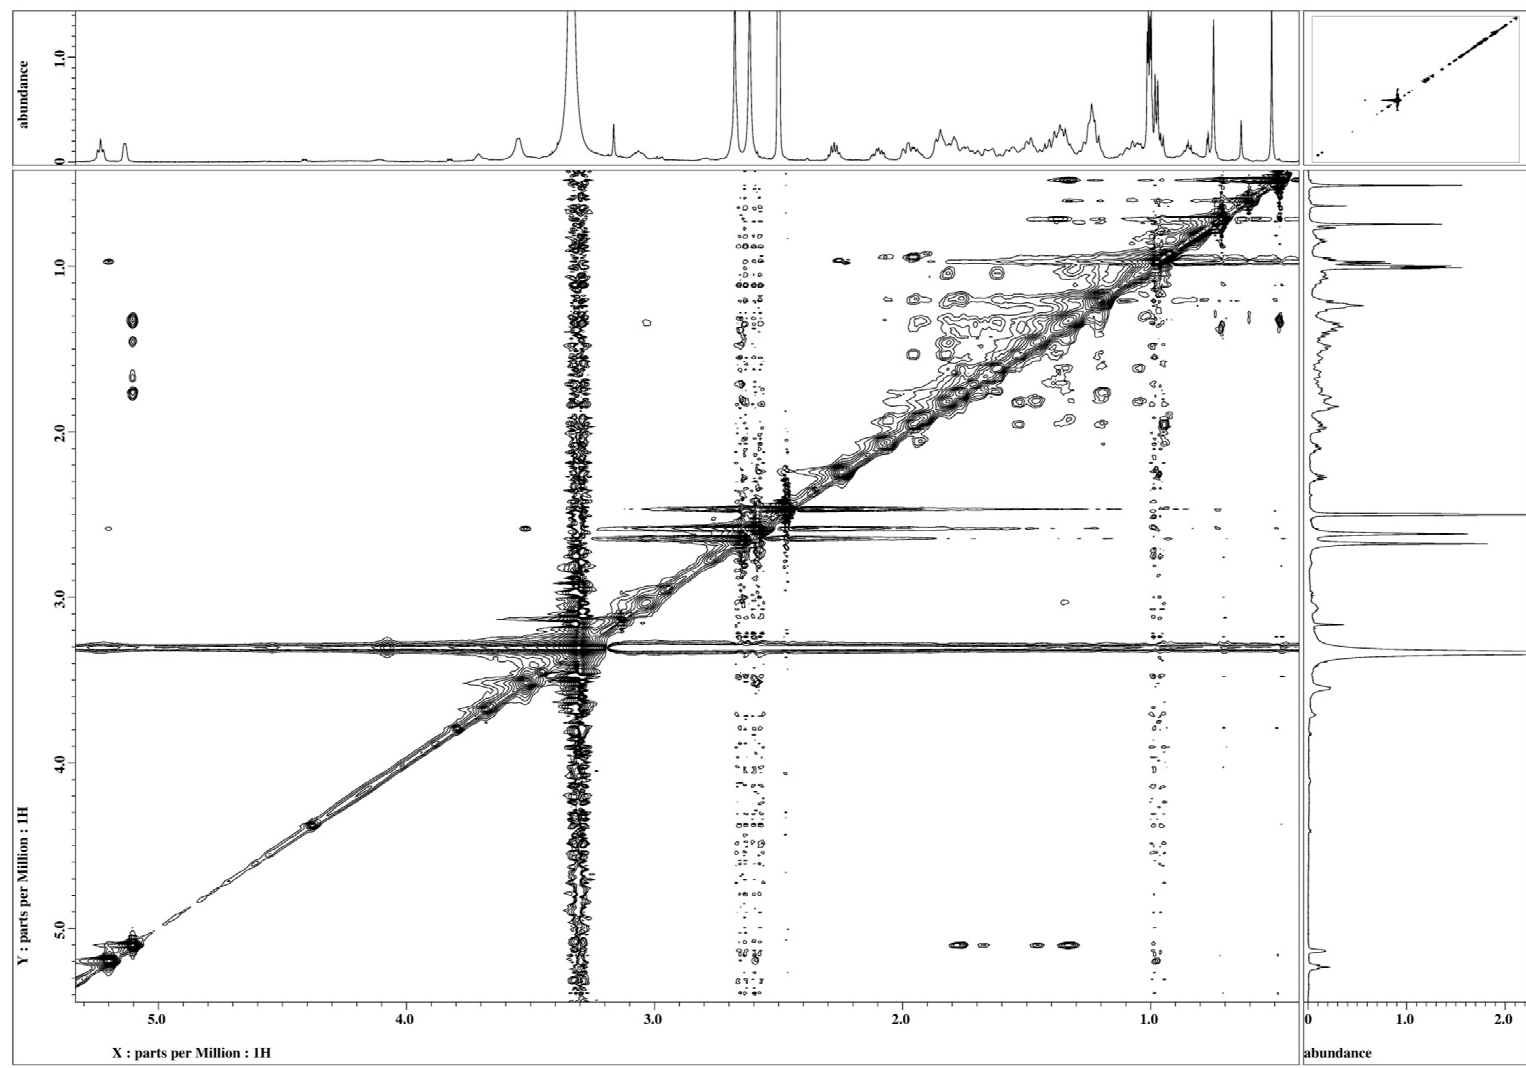



S22 Expansion of Plakinamine P (1) 2D-NOESY spectrum (600 MHz, DMSO-*d*<sub>6</sub>) showing key correlations for H-3

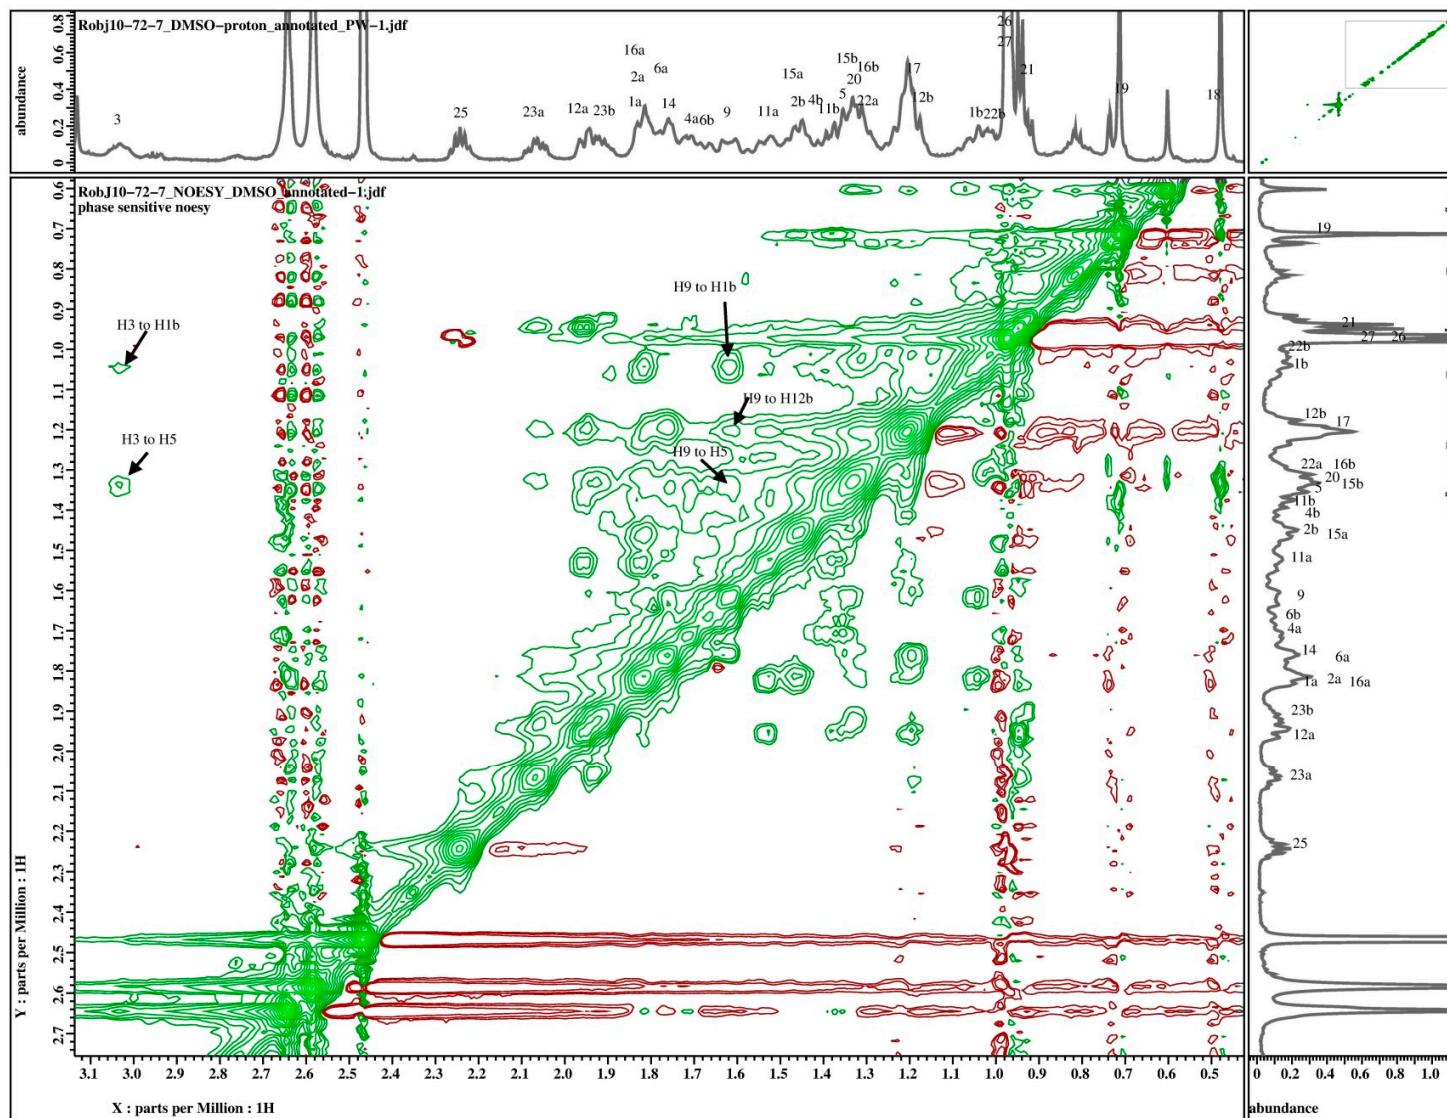

S23 ROESY spectrum (600 MHz, DMSO-*d*<sub>6</sub>) of Plakinamine P (1)

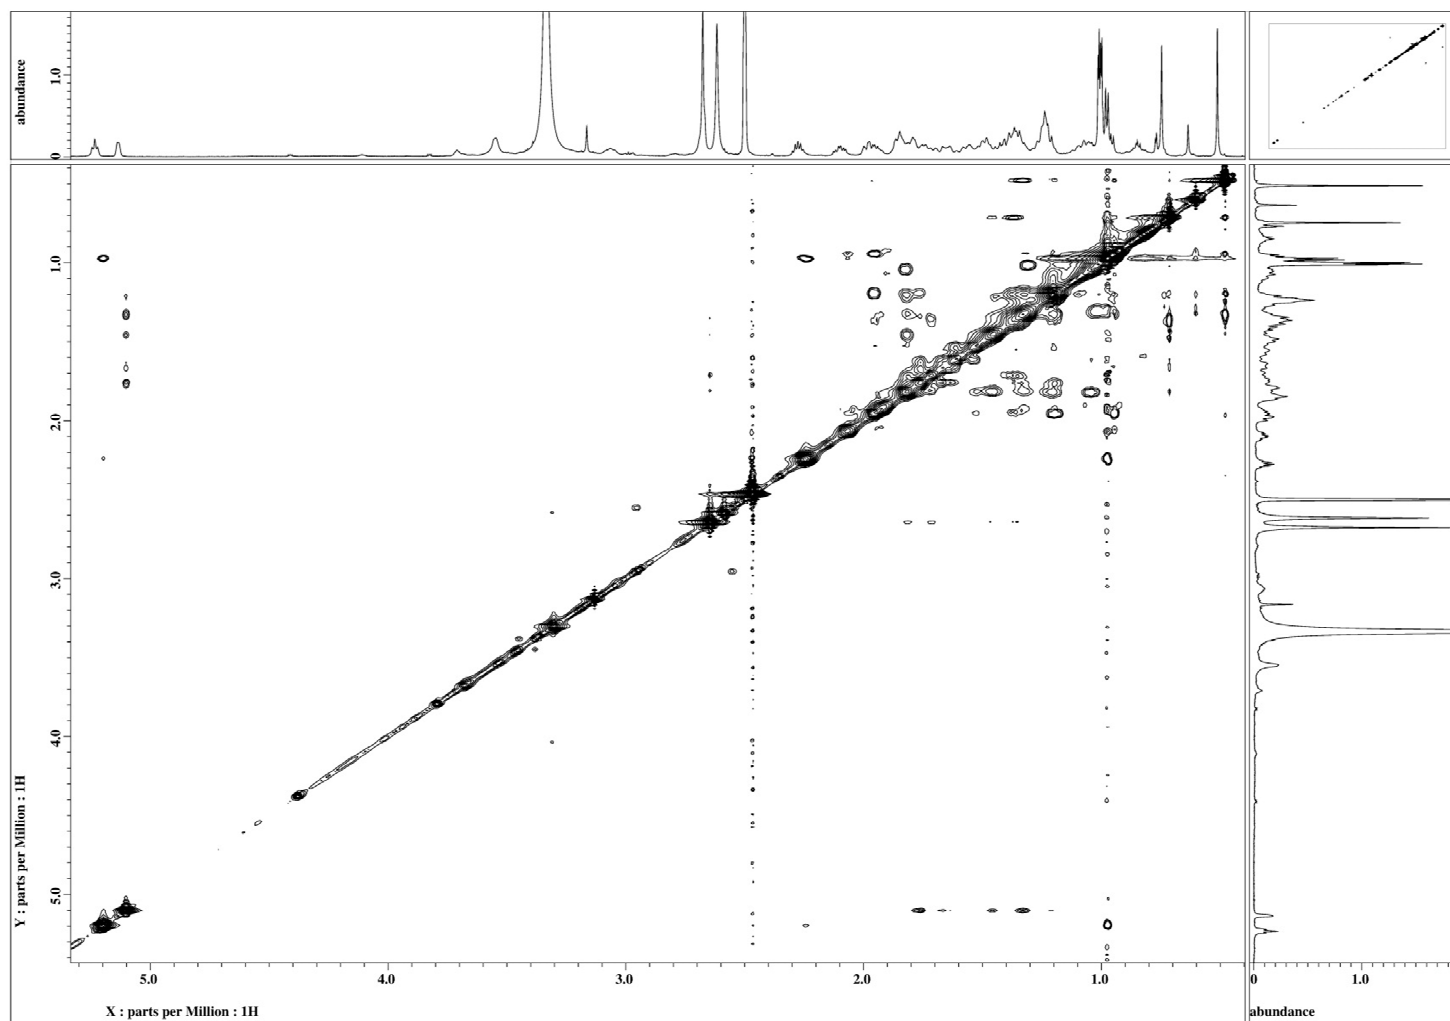



Table S2: Table of <sup>1</sup>H and <sup>13</sup>C NMR Data for plakinamine P (**1**) (600 MHz, DMSO-*d*<sub>6</sub>)

| position | $\delta_c$ ,<br>type     | $\delta_H$ (J in Hz)           | COSY          | HMBC <sup>a</sup> | ROESY                            | NOESY          |
|----------|--------------------------|--------------------------------|---------------|-------------------|----------------------------------|----------------|
| 1a       | 36.3,<br>CH <sub>2</sub> | 1.86, m                        | 1b, 2b        | 3, 5              | 1b, 11a, 19                      |                |
| 1b       |                          | 1.07, m                        | 1a, 2ab       |                   | 1a, 9                            | 3, 9           |
| 2a       | 21.7,<br>CH <sub>2</sub> | 1.83, m                        | 1b            |                   | 2b, 32/33                        |                |
| 2b       |                          | 1.48, m                        | 1ab, 2a       |                   | 1a, 19, 32/33                    |                |
| 3        | 63.7, CH<br>27.7,        | 3.07, br m                     | 2b, 4ab       |                   | 32/33                            | 1b, 5          |
| 4a       | CH <sub>2</sub>          | 1.74, m                        | 3, 4b         |                   | 4b, 5, 32/33                     |                |
| 4b       |                          | 1.41, m                        | 3, 4a, 5      |                   | 4a, 19                           |                |
| 5        | 40.5, CH<br>29.0,        | 1.37, m                        | 4ab, 6b       |                   | 4a                               | 3, 9           |
| 6a       | CH <sub>2</sub>          | 1.79, m                        | 5, 6b, 7      |                   | 5, 7                             | 7              |
| 6b       |                          | 1.69, m                        | 5, 7          |                   | 7                                | 7              |
| 7        | 116.9,<br>CH             | 5.13, br s                     | 6ab           | 5, 6, 9, 14       | 6ab, 14, 15ab                    | 6ab, 15ab      |
| 8        | 139.0, C                 |                                |               |                   |                                  |                |
| 9        | 48.2, CH                 | 1.64, m                        | 7, 11ab       |                   | 1b, 12b, 14                      | 1b, 5, 12b, 14 |
| 10       | 33.8, C<br>21.0,         |                                |               |                   |                                  |                |
| 11a      | CH <sub>2</sub>          | 1.59, m                        | 9, 11b, 12ab  | 9                 | 1a, 12a                          | 12a            |
| 11b      |                          | 1.42, m                        | 9, 11a, 12ab  |                   | 12a, 19                          |                |
| 12a      | 38.7,<br>CH <sub>2</sub> | 1.99, m                        | 11ab, 12b     |                   | 11ab, 12b, 18, 21                | 11a, 12b, 21   |
| 12b      |                          | 1.23, m                        | 11ab          |                   | 9, 12a, 14                       | 9, 12a         |
| 13       | 43.0, C                  |                                |               |                   |                                  |                |
| 14       | 54.3, CH<br>22.6,        | 1.79, m                        | 15ab          |                   | 5, 7, 12b                        | 9              |
| 15a      | CH <sub>2</sub>          | 1.49, m                        | 14, 15b, 16ab |                   | 7, 16a                           | 7              |
| 15b      |                          | 1.36, m                        |               |                   | 7, 16ab, 18                      | 7              |
| 16a      | 27.4,<br>CH <sub>2</sub> | 1.85, m                        |               |                   | 17                               |                |
| 16b      |                          | 1.25, m                        |               |                   | 16a, 18                          |                |
| 17       | 55.2, CH<br>11.7,        | 1.22, m                        | 18            |                   | 11b, 12a, 15b, 16b, 17,          |                |
| 18       | CH <sub>3</sub>          | 0.51, s                        | 17            | 12, 13, 14, 17    | 19, 20, 21                       |                |
| 19       | 12.7,<br>CH <sub>3</sub> | 0.75, s                        | 1b            | 1, 5, 9, 10       | 1a, 2b, 4b, 11b, 18 <sup>b</sup> |                |
| 20       | 36.2, CH<br>18.6,        | 1.36, m                        |               |                   | 18, 22b                          |                |
| 21       | CH <sub>3</sub>          | 0.98, d (6.9)                  | 20            | 17, 20            | 12a, 18, 23a                     | 12a            |
| 22a      | 35.1,<br>CH <sub>2</sub> | 1.34, m                        | 20, 22b, 23ab |                   | 21, 22b, 25                      |                |
| 22b      |                          | 1.05, m                        | 22a, 23ab     |                   | 22a                              |                |
| 23a      | 26.2,<br>CH <sub>2</sub> | 2.10, ddd (13.1, 13.1,<br>5.5) | 22ab, 23b     | 24, 28            | 21, 23b, 26/27                   | 21, 23b        |
| 23b      |                          | 1.95, m                        | 22ab, 23a     | 24, 28            | 22ab, 26/27                      | 20, 23a        |
| 24       | 155.6, C                 |                                |               |                   |                                  |                |
| 25       | 34.1, CH<br>21.9,        | 2.28, sep. (6.9)               | 26/27         | 23, 24, 26/27, 28 | 22a, 26/27, 28                   | 26/27          |
| 26       | CH <sub>3</sub>          | 1.01, d (6.9)                  | 25            | 24, 25, 27        | 23ab, 25, 28                     |                |

|    |                          |               |     |            |                      |                  |
|----|--------------------------|---------------|-----|------------|----------------------|------------------|
| 27 | 21.7,<br>CH <sub>3</sub> | 1.02, d (6.9) | 25  | 24, 25, 26 | 23ab, 25, 28         |                  |
| 28 | 112.8,<br>CH             | 5.23, t (7.6) | 29a | 23, 25, 29 | 25, 26/27, 29, 30/31 | 25, 26/27, 30/31 |
| 29 | 54.1,<br>CH <sub>2</sub> | 3.55, br s    | 28  |            |                      | 30/31            |
| 30 | 41.7,<br>CH <sub>3</sub> | 2.62, s       |     | 29, 31     |                      |                  |
| 31 | 41.7,<br>CH <sub>3</sub> | 2.62, s       |     | 29, 30     |                      |                  |
| 32 | 39.8,<br>CH <sub>3</sub> | 2.68, s       |     | 3, 33      | 1a, 2b, 4ab, 5       |                  |
| 33 | 39.8,<br>CH <sub>3</sub> | 2.68, s       |     | 3, 32      | 1a, 2b, 4ab, 5       |                  |

<sup>a</sup>gHMBC correlations, optimized for 8 Hz, are from proton(s) stated to the carbons listed

<sup>b</sup>Though <sup>1</sup>H chemical shifts of 4b and 11b are very close, the ROESY correlations appear to go to both

## S25 High resolution DART mass spectrometry data of plakinamine P (1)

HRMS of plakinamine P was measured on a JEOL AccuTOF-DART 4G using the DART attachment. The voltages for the atmospheric pressure interface are: Orifice 1 = 30 V; Orifice 2 = 5 V; Ring lens = 5 V; Ion guide voltage = 1000 V; Orifice 1 temperature = 100 °C. Mass spectra were stored at a rate of 1 spectrum per 0.4 seconds over the  $m/z$  range 100 to 1000 and a resolving power of >10,000 (FWHM). PEG 600 was measured by DART as a reference standard within the same data file as the DART measurements.

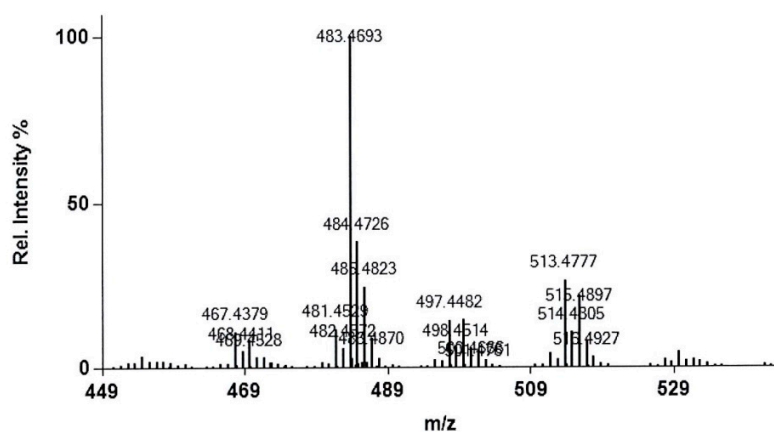

Mass Spectrum

Elemental Compositions  
Element Limits: C 0/50 H 0/100 O 0/10 N 0/10  
Tolerance: 5 mmu Even or odd electron ion or both: Even  
Electron correction: None.Charges: 1  
Minimum unsaturation: -1Maximum unsaturation: 100

| Calc. m/z  | Abund % | mmu   | DBE | Composition |
|------------|---------|-------|-----|-------------|
| 483.467825 | 100.000 | -1.44 | 5.5 | C33H59N2    |

S26 Picture and taxonomic description of the *Plakina* sp. used in the study

*Plakina* sp. Undescribed Caribbean species

Class Homoscleromorpha, Order Homosclerophorida, Family Plakinidae

Sample 25-V-93-3-9. HBOM Catalog Number 0004.001

The external morphology is bulbous to globular (1-2 cm thick, 2-6 cm in diameter), with a single oscule per bulb. Oscules are less than 4 mm wide with a tubular and darkened membrane projection. The surface of the sponge is smooth and the consistency is gelatinous and compressible. The specimen is light brown externally and tan in color internally, both in life and preserved. Spicules are in very low abundance and consist of small ramified calthrops (tetralophose and trilophose), rare smooth non-lophose calthrops, and small diod microrhabs (7-10  $\mu\text{m}$  in length and  $<1 \mu\text{m}$  in width). Calthrops are regular in size, less than 20  $\mu\text{m}$  in total size, with rays 8-10  $\mu\text{m}$  x 2-3  $\mu\text{m}$ . Trilophose calthrops usually have deformed rays with variation in the pattern of ramification between rays. The lophose calthrops are typical of the genus *Plakina*. There are five *Plakina* species currently recognized for the Caribbean: *Plakina elisa*, *Plakina nathaliae*, *Plakina tetralopha*, *Plakina jamaicensis* and *Plakina arletensis*. The present *Plakina* specimen differs from those species in general morphology for which it has a much thicker growth, bulbous shape, and unique oscule morphology. The spicule combination, the tendency to deformed rays and diverse branching pattern within a spicule, and their low density in the body, are unique characteristics of this sample that indicate that it may be an undescribed *Plakina* species. Further study of the histology and genetics of this specimen will allow its distinction from the other Caribbean species.

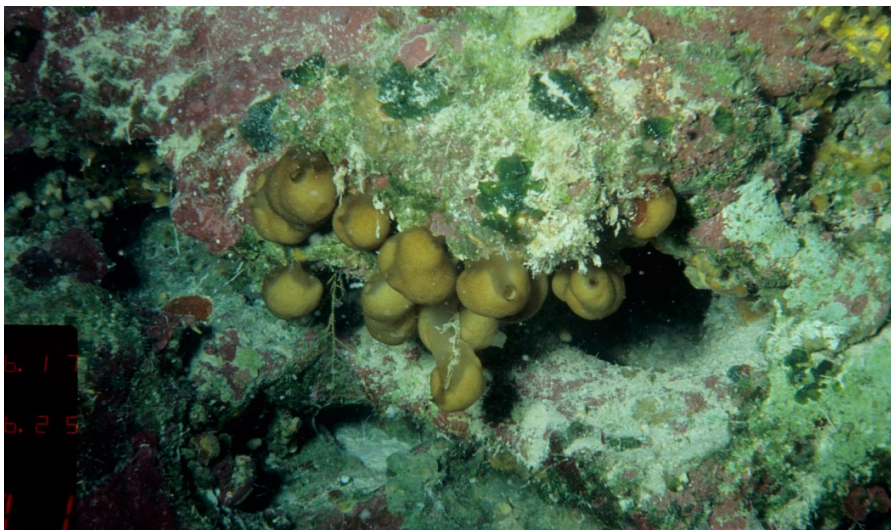

Figure S26A. Under water photograph of *Plakina* sp. collected from a cavern at 93 m deep, Crooked Island, Bahamas.

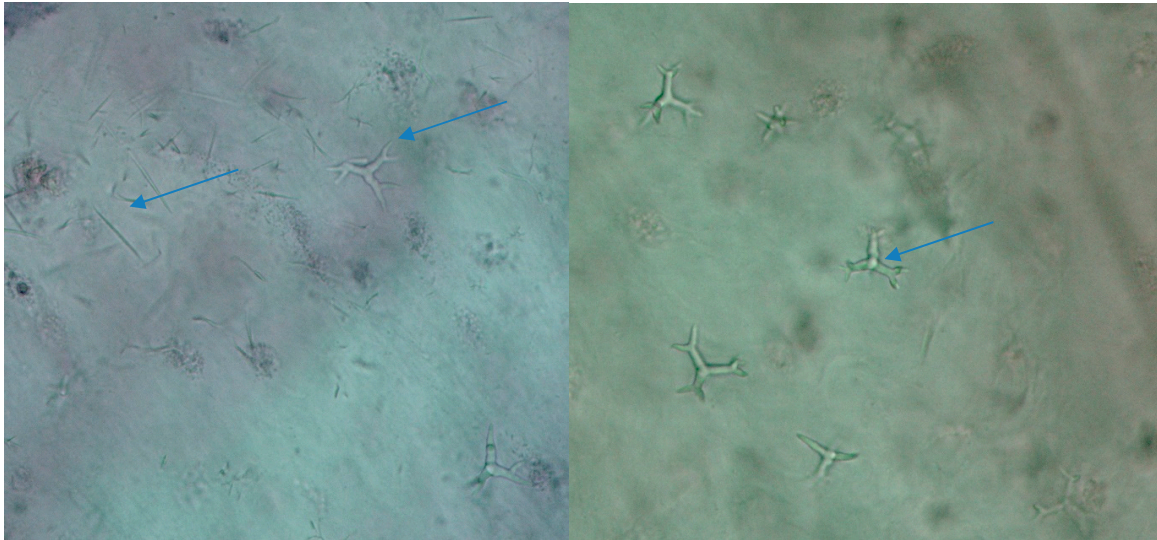

Figure S26B. Left image : trilophose calthrops with deformed rays, and diactineal microrhabds.

Right image tetralophose calthrops.

Ruiz, C., et al., *Descriptions of new sponge species and genus, including aspiculate Plakinidae, overturn the Homoscleromorpha classification*. *Zoological Journal of the Linnean Society*, 2017. **179**(4): p. 707-724
